# Supplementary material for: Life Cycle Greenhouse Gas Emissions of Coal‐Fired Electricity Generation
Source: Wiley journal article supplement (doi:10.1111/j.1530-9290.2012.00465.x), 2012-04-01
Supplement: JIEC_465_sm_suppmat.pdf [file JIEC_465_sm_suppmat.pdf]

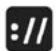

## SUPPORTING INFORMATION FOR:

Whitaker, M., G. Heath, P. O'Donoghue, and M. Vorum. 2012. Life Cycle Greenhouse Gas Emissions of Coal-Fired Electricity Generation: Systematic Review and Harmonization. *Journal of Industrial Ecology*.

### Summary

**Please note that the article for which this document serves as supporting information has been corrected and updated by corrigenda available on the Journal's Web site. Corrigendum 2 provides changes to the results for the supercritical coal combustion technology reflecting the use of a different and corrected thermal efficiency for harmonization. The corrigendum includes a new supporting information document that contains revisions that reflect corrections from the original article regarding results for the supercritical technology. Overall conclusions have not changed.**

This supporting information provides the detailed methodology for the two-stage quantitative test developed to determine the appropriate level of harmonization for a given electricity-generation technology analyzed by the Life Cycle Assessment (LCA) Harmonization Project led by the U.S. National Renewable Energy Laboratory. The full list of references reviewed for this harmonization analysis is also included.

### Selection of Harmonization Level

A two-stage quantitative test was developed to determine the appropriate level of harmonization for a given electricity-generation technology analyzed by the Life Cycle Assessment (LCA) Harmonization Project led by the U.S. National Renewable Energy Laboratory. The test was intended to provide information about how to allocate limited resources to the development of more-robust estimates of central tendency and variability and to inform decision makers in the near term; the statistical approach used was not necessarily ideal.

First, the standard deviation (SD) and interquartile range magnitude (IQR = 75th – 25th percentile value) of published estimates of life cycle GHG emissions (in g CO<sub>2</sub>e/kWh) were compared to the arithmetic mean (mean) of the pool of estimates from literature

that had passed the quality and relevance screens. Variability in published estimates was deemed “high” if the SD and IQR were greater than or equal to 50% of the mean and “low” if they were less than 50%.

The next test was only applicable to non-coal technologies, but nevertheless is described here to provide a more complete understanding of the LCA Harmonization project’s methods as a whole. In this step, the range of published estimates was compared to the mean value for estimates for subcritical pulverized coal combustion (subcritical) drawn from the literature which had passed the quality and relevance screens (1,100 g CO<sub>2</sub>e/kWh). If the range was greater than or equal to 10% of that of pulverized coal, then the published variability was considered significant. Using these tests, when variability in a given electricity-generation technology’s published estimates was deemed “low” and “not significant” relative to coal, the less resource-intensive level of harmonization appeared sufficient to achieve the project goals.

For coal-fired electricity generation only the first test applied, as coal was the benchmark for the second test. For published coal estimates, the SD and IQR were approximately 20% and 25% of the mean, respectively. Both values were well below the 50% threshold for variability that would have indicated the need for the more rigorous level of harmonization.

### **Exclusion of Integrated Gasification Combined Cycle with Carbon Capture and Storage from Harmonization**

Nine references (Corrado et al. 2006; Fiaschi and Lombardi 2002; Jaramillo et al. 2006; Koornneef et al. 2008; NETL 2010b; Odeh and Cockerill 2008; Ruether et al. 2004; SENES 2005; Wibberley 2001) with 11 estimates of life cycle greenhouse gas (GHG) emissions for integrated gasification combined cycle with carbon capture and storage systems (IGCC/CCS) passed the literature screens for the present study. As a future technology with multiple potential paths to implementation, however, the reported LCA methodologies and study assumptions in the literature varied greatly and would have required expanding the scope of the study beyond light harmonization. Therefore, only published estimates of IGCC/CCS life cycle GHG emissions are presented in this article, which ranged from 106 g to 396 g CO<sub>2</sub>e/kWh with a mean of 230 g CO<sub>2</sub>e/kWh, a median of 214 g CO<sub>2</sub>e/kWh, IQR of 142-324 g CO<sub>2</sub>e/kWh, and a standard deviation of 106 g CO<sub>2</sub>e/kWh.

## Disaggregation of Greenhouse Gas Emissions by Stage

To pass the second screen, published studies were required to be full LCAs, including assessment of GHG emissions throughout the coal-fired electricity generation life cycle. Only a subset of the studies, however, quantitatively reported GHG emissions disaggregated by life cycle stage. Based on results reported by studies that disaggregated by life cycle phase, table S1 provides GHG emissions by stage for subcritical, integrated gasification combined cycle (IGCC), fluidized bed, and supercritical pulverized (supercritical) coal combustion technologies. The table also reports results for the references that analyzed IGCC/CCS, and summarizes the results for the four non-CCS technologies collectively. Table S1 reports GHG emission estimates prior to harmonization.

Results in Table S1 are disaggregated into three general life cycle phases, with the operational phase having two sub-phases.

– **Upstream:** raw materials extraction, materials manufacturing, component manufacturing, transportation from the manufacturing facility to the construction site, and on-site construction;

– **Operational:** Ongoing combustion and fuel cycle; ongoing non-combustion or fuel cycle;

a. *Ongoing combustion and fuel cycle:* coal combustion and fuel cycle processes that are modulated by the amount of coal combusted, including mining, preparation, and transport of coal to the plant;

b. *Ongoing non-combustion and non-fuel cycle:* power plant operation and maintenance, operational non-fuel materials;

– **Downstream:** Waste disposal, power-plant decommissioning, coal mine land rehabilitation.

In general, references that provided enough information for disaggregation reported results for the upstream and operational phases. Downstream phases were addressed in fewer studies and, when studied, were found to contribute less than 1% to life cycle GHG emissions.

**Table S1.** Greenhouse gas emissions disaggregated by life cycle stage for coal-fired electricity generation.

| Technology | Parameter | Up-<br>stream | Ongoing<br>Combustion/Fuel<br>Cycle | Ongoing<br>Non-<br>Combustion | Dow<br>nstream |
|------------|-----------|---------------|-------------------------------------|-------------------------------|----------------|
|------------|-----------|---------------|-------------------------------------|-------------------------------|----------------|

|                                  |                                   |     |      |     |     |
|----------------------------------|-----------------------------------|-----|------|-----|-----|
| Coal—Pulverized<br>Subcritical   | Mean (g CO <sub>2</sub> e/kWh)    | <5  | 1140 | <5  | <5  |
|                                  | Median (g CO <sub>2</sub> e/kWh)  | <5  | 1150 | <5  | <5  |
|                                  | Std dev (g CO <sub>2</sub> e/kWh) | <5  | 1170 | <5  | <5  |
|                                  | Mean percent of total             | <1% | 99%  | <1% | <1% |
|                                  | Count of estimates                | 16  | 19   | 3   | 9   |
|                                  | Count of references               | 11  | 13   | 3   | 5   |
| Coal—<br>IGCC                    | Mean (g CO <sub>2</sub> e/kWh)    | <5  | 850  | 190 | <5  |
|                                  | Median (g CO <sub>2</sub> e/kWh)  | <5  | 790  | 190 | <5  |
|                                  | Std dev (g CO <sub>2</sub> e/kWh) | <5  | 160  | N/A | <5  |
|                                  | Mean percent of total             | <1% | 82%  | 18% | <1% |
|                                  | Count of estimates                | 6   | 6    | 1   | 2   |
|                                  | Count of references               | 5   | 5    | 1   | 2   |
| Coal—<br>Fluidized Bed           | Mean (g CO <sub>2</sub> e/kWh)    | <5  | 1070 | 30  | <5  |
|                                  | Median (g CO <sub>2</sub> e/kWh)  | 5   | 1010 | 30  | <5  |
|                                  | Std dev (g CO <sub>2</sub> e/kWh) | <5  | 150  | N/A | N/A |
|                                  | Mean percent of total             | <1% | 97%  | 3%  | <1% |
|                                  | Count of estimates                | 3   | 3    | 1   | 1   |
|                                  | Count of references               | 3   | 3    | 1   | 1   |
| Coal—Pulverized<br>Supercritical | Mean (g CO <sub>2</sub> e/kWh)    | 6   | 880  | N/A | N/A |
|                                  | Median (g CO <sub>2</sub> e/kWh)  | 6   | 880  | N/A | N/A |
|                                  | Std dev (g CO <sub>2</sub> e/kWh) | 5   | 70   | N/A | N/A |
|                                  | Mean percent of total             | <1% | 99%  | N/A | N/A |

|                                                                                                                                                                                                                                                                                                                                                                                                    |                                     |     |      |     |     |
|----------------------------------------------------------------------------------------------------------------------------------------------------------------------------------------------------------------------------------------------------------------------------------------------------------------------------------------------------------------------------------------------------|-------------------------------------|-----|------|-----|-----|
|                                                                                                                                                                                                                                                                                                                                                                                                    | Count of estimates                  | 2   | 2    | 0   | 0   |
|                                                                                                                                                                                                                                                                                                                                                                                                    | Count of references                 | 2   | 2    | 0   | 0   |
| Coal—<br>Non-CCS Subset                                                                                                                                                                                                                                                                                                                                                                            | Mean (g CO <sub>2</sub> e/kWh)      | <5  | 1060 | 50  | <5  |
|                                                                                                                                                                                                                                                                                                                                                                                                    | Median (g CO <sub>2</sub> e/kWh)    | <5  | 1010 | 10  | <5  |
|                                                                                                                                                                                                                                                                                                                                                                                                    | Std dev (g CO <sub>2</sub> e/kWh)   | <5  | 200  | 80  | <5  |
|                                                                                                                                                                                                                                                                                                                                                                                                    | Mean percent of total               | <1% | 95%  | 4%  | <1% |
|                                                                                                                                                                                                                                                                                                                                                                                                    | Count of estimates                  | 27  | 30   | 5   | 12  |
|                                                                                                                                                                                                                                                                                                                                                                                                    | Count of references                 | 21  | 23   | 5   | 8   |
| Coal—<br>IGCC with CCS                                                                                                                                                                                                                                                                                                                                                                             | Mean (g CO <sub>2</sub> e/kWh)      | 5   | 250  | 120 | <5  |
|                                                                                                                                                                                                                                                                                                                                                                                                    | Median (g CO <sub>2</sub> e/kWh)    | <5  | 230  | 120 | <5  |
|                                                                                                                                                                                                                                                                                                                                                                                                    | Std. dev. (g CO <sub>2</sub> e/kWh) | 7   | 130  | 150 | N/A |
|                                                                                                                                                                                                                                                                                                                                                                                                    | Mean percent of total               | 1%  | 66%  | 33% | <1% |
|                                                                                                                                                                                                                                                                                                                                                                                                    | Count of estimates                  | 3   | 3    | 2   | 1   |
|                                                                                                                                                                                                                                                                                                                                                                                                    | Count of references                 | 3   | 3    | 2   | 1   |
| The sum of percentages might not equal 100% due to independent rounding and averaging. Statistical results for mean, median, and standard deviation (std dev) are rounded to two significant digits if less than 1,000, three significant digits if equal to or greater than 1,000, and to <5 if less than 5. Percentages are rounded to the nearest whole number as an indication of uncertainty. |                                     |     |      |     |     |

As shown in table S1, for the four coal-combustion technologies without CCS, the combination of ongoing operational combustion, fuel cycle and non-combustion emissions accounted for more than 99% of life cycle GHG emissions. GHG emissions specifically related to coal combustion and the fuel cycle accounted for an average of more than 95% of life cycle GHG emissions. It

should be noted that the estimate for non-combustion, non-fuel cycle GHG emissions is based on a small dataset of only 5 estimates and the large contribution associated with IGCC plant maintenance predicted by Fiaschi and Lombardi (2002) has not been independently confirmed by other references considered in this study.

For IGCC with CCS, downstream GHG emissions were still insignificant, but the contribution from upstream processes increased to approximately 1%, as operational GHG emissions associated with coal combustion were assumed to be captured (as opposed to being emitted to the atmosphere). Of note for IGCC with CCS systems, the relative contribution to life cycle GHG emissions from operational, non-combustion, non-fuel cycle processes increases to approximately 33%. This is due to a lesser contribution to GHG emissions from the operational-combustion phase; a majority of the combustion GHG emissions are captured and stored.

#### **Rationale for Not Harmonizing Upstream and Downstream Processes and Parameters Associated with Those Phases**

Harmonization steps associated with coal mine methane, thermal efficiency, and CEFs focused on the operation phase of coal-fired electricity production, including ongoing combustion and non-combustion emissions. The complete coal-fired electricity generation life cycle also includes upstream and downstream processes (power plant construction and decommissioning), but no harmonization steps were conducted to add or subtract any impacts from upstream or downstream processes. Because more than 99% of the life cycle GHG emissions for coal-fired electricity generation are associated with the coal fuel cycle and ongoing combustion and non-combustion processes, parameters that impact the relative contributions of the upstream and downstream processes to life cycle GHG emissions were not considered important for the harmonization process. (They are reported in table 1 for informational purposes only.) These un-harmonized parameters include capacity, lifetime, and capacity factor. In addition, harmonization by system boundary –adding consistent estimates for upstream and downstream phase GHG emissions to those studies that didn't assess those phases – was judged to not significantly improve consistency in results, and was therefore not completed.

### **Harmonization Methods for Key Parameters**

The following methods were used to harmonize results for the key parameters described here.

### **Global Warming Potential**

References were analyzed to determine whether IPCC 2007 global warming potentials (GWPs) were used (IPCC 2007), or if emissions of GHGs could be disaggregated into, at least, carbon dioxide (CO<sub>2</sub>), methane (CH<sub>4</sub>), and nitrous oxide (N<sub>2</sub>O). Contributions of other GHGs either were negligible within the study boundary or were not consistently reported in the literature. Life cycle GHG emissions were recalculated using IPCC 2007 GWPs for those references that reported mass emissions of carbon dioxide, methane, and nitrous oxide separately.

### **Transmission and Distribution Loss**

References that included transmission and distribution (T&D) losses published GHG emissions per delivered kilowatt-hour (kWh) instead of GHG emissions per generated kilowatt-hour. T&D losses were removed from the system boundary by converting the denominator of the published ratio from distributed kWh to generated kWh using the T&D loss percent reported for each reference. GHG emissions associated with T&D infrastructure were also excluded by subtraction.

### **Coal Mine Methane**

The complete description of the coal mine methane harmonization procedure was included in the Coal Mine Methane section of the article. The median of coal mine methane emissions for those references that reported the value was calculated, and this value (63 g CO<sub>2</sub>e/kWh) was added to the reported life cycle GHG emissions for those references that did not include emissions of coal mine methane in their estimates. Plausible values for coal mine methane emissions vary greatly from mine to mine and should be carefully considered when applying the harmonized results of this study to project-specific conditions.

### **Thermal Efficiency**

The thermal efficiency harmonization step assumes that variations in thermal efficiency affect the entire fuel cycle (including combustion) as the amount of coal required per kWh generated changes. An increase in thermal efficiency indicates a decreased coal



consumption requirement and reduced GHG emissions per generated kWh following harmonization, as shown in equation S1. For all evaluated technologies, the assumed fraction of life cycle GHG emissions related to the fuel cycle is set at 99%. The thermal efficiency used for harmonization ( $TE_{h,t}$ ) varies by technology type (t), according to the following equation.

$$GHG_{h,te} = FC * \frac{TE_p}{TE_{h,t}} * GHG_p + (1 - FC) * GHG_p \quad (S1)$$

Where:

- $GHG_{h,te}$  = Life cycle GHG emissions harmonized by thermal efficiency (g CO<sub>2e</sub>/kWh); Subscript h,te denotes harmonized by thermal efficiency.
- FC = Assumed fraction of life cycle GHG emissions related to fuel cycle (99%);
- $TE_p$  = Published thermal efficiency for each reference (%);
- $TE_{h,t}$  = Thermal efficiency used for harmonization based on technology (%); and
- $GHG_p$  = Published life cycle GHG emissions for each reference (g CO<sub>2e</sub>/kWh).

### Combustion Carbon Dioxide Emission Factor

Analogous to the harmonization process used for thermal efficiency, life cycle GHG emissions related to the fuel cycle are also adjusted based on changes in the combustion carbon dioxide emission factor (CEF). The CEF is a function of thermal efficiency, coal carbon content, and coal heating value (as described in equation 3 of the article). To avoid double counting during cumulative harmonization steps, the CEF is utilized in lieu of thermal efficiency. The application of the CEF implicitly includes thermal efficiency but also adds the impacts of coal carbon content and coal heating value to the harmonization process. An increase in CEF indicates increased carbon dioxide emitted per kWh generated, resulting in increased life cycle GHG emissions following harmonization as shown in equation S2. As with thermal efficiency, the fraction of life cycle GHG emissions related to the fuel cycle is assumed to be 99% for all technologies, and the CEF used for harmonization varies by technology (t).

$$GHG_{h,cef} = FC * \frac{CEF_{h,t}}{CEF_p} * GHG_p + (1 - FC) * GHG_p \quad (S2)$$

Where:

- $\text{GHG}_{\text{h,cef}}$  = Life cycle GHG emissions harmonized by CEF ( $\text{g CO}_2\text{e/kWh}$ ). Subscript h,cef denotes harmonized by CEF;
- FC = Assumed fraction of life cycle GHG emissions modulated by the fuel cycle (99%);
- $\text{CEF}_{\text{h,t}}$  = CEF used for harmonization based on technology,  $t$  ( $\text{g CO}_2/\text{kWh}$ );
- $\text{CEF}_p$  = Published CEF for each reference ( $\text{g CO}_2/\text{kWh}$ ); and
- $\text{GHG}_p$  = Published life cycle GHG emissions for each reference ( $\text{g CO}_2\text{e/kWh}$ ).

### Numerical Results for the Harmonization Processes

Table S2 lists the technology-specific harmonization results, after independent application of each harmonization step, for each of the life cycle GHG emission scenarios described in table 1 of the article. The published GHG emission estimates are rank ordered from least to greatest in figure 2(a) of the article, with the individual harmonization steps plotted in figures 2(b) through 2(f) to illustrate the effects of each harmonization step on the rank-ordered estimates. Figures 2(g) and 2(h) summarize the effect of system harmonization and cumulative - all parameter (system plus technical) harmonization, respectively. Table S2 provides the numerical results corresponding to the plots in figure 2.

Figure 2 in the article contains a plot for each harmonization step independently to provide insight on the impact of each harmonization step on the published GHG-emission estimates. The final plot, figure 2(h), displays the results of applying all of the harmonization steps cumulatively. Figure S1 (below) breaks-down the cumulative – all parameter harmonization step from figure 2(h) into discrete steps to show the effects of each sequential (i.e., cumulative from all previous steps) harmonization step. The sequential harmonization process included the following steps.

- Step 1. Harmonizing by IPCC 2007 GWPs.
- Step 2. Harmonizing system boundaries to exclude T&D losses.
- Step 3. Harmonizing system boundaries to add coal mine methane emissions to studies that did not explicitly report their inclusion.

- Step 4. Harmonizing coal fuel-cycle GHG emissions by power plant thermal efficiency.
- Step 5. Harmonizing by coal CEF as a function of coal quality and thermal efficiency.

The CEF harmonization includes the impacts of thermal efficiency. Therefore, step 4 is skipped when presenting results from step 5 in figure S1.

### Collective Harmonization Across Technologies

The harmonization analysis in the article uses technology-specific thermal efficiency and CEF values to harmonize each technology type independently. The results of the collective harmonization conducted by harmonizing all coal technologies to the same benchmark thermal efficiency (33%) and CEF (970 g CO<sub>2</sub>/kWh) values are reported in Table S3 with harmonization by all parameters resulting in a median of 1,032 g CO<sub>2</sub>/kWh (IQR = 1,000-1,090 g CO<sub>2</sub>/kWh) compared with published median of 1,001 g CO<sub>2</sub>/kWh (IQR = 891-1,134 g CO<sub>2</sub>/kWh).

**Table S2.** Numerical results for the independent application of harmonization steps for life cycle greenhouse gas emissions of coal electricity generation.

| Author   | Pub. Year | Tech. | Published | Harmonization Steps |                   |                            |                    |                                            |                         |                             |
|----------|-----------|-------|-----------|---------------------|-------------------|----------------------------|--------------------|--------------------------------------------|-------------------------|-----------------------------|
|          |           |       |           | System - GWP        | System - T&D Loss | System - Coal Mine Methane | Thermal Efficiency | Combustion CO <sub>2</sub> Emission Factor | System – All Parameters | Cumulative - All Parameters |
| Akai     | 1997      | 2     | 730       | 730                 | 730               | 792                        | 823                | 912                                        | 792                     | 991                         |
| Bates    | 1995      | 1     | 958       | 958                 | 958               | 958                        | 1,001              | 958                                        | 958                     | 958                         |
| Bates    | 1995      | 1     | 1,015     | 1,015               | 1,015             | 1,015                      | 1,033              | 983                                        | 1,015                   | 983                         |
| Cottrell | 2003      | 3     | 959       | 959                 | 959               | 959                        | 902                | 1,099                                      | 959                     | 1,099                       |
| Damen    | 2003      | 1     | 1,009     | 1,011               | 1,009             | 1,009                      | 1,209              | 1,055                                      | 1,011                   | 1,058                       |
| Dolan    | 2007      | 1     | 1,452     | 1,452               | 1,452             | 1,452                      | 1,452              | 1,039                                      | 1,452                   | 1,039                       |
| Dones    | 1999      | 1     | 762       | 762                 | 762               | 762                        | 762                | 1,066                                      | 762                     | 1,066                       |

|       |      |   |       |       |       |       |       |       |       |       |
|-------|------|---|-------|-------|-------|-------|-------|-------|-------|-------|
| Dones | 1999 | 3 | 771   | 771   | 771   | 771   | 771   | 1,170 | 771   | 1,170 |
| Dones | 2004 | 1 | 1,048 | 1,048 | 1,048 | 1,048 | 1,048 | 1,062 | 1,048 | 1,062 |
| Dones | 2004 | 1 | 1,114 | 1,114 | 1,114 | 1,114 | 1,114 | 1,037 | 1,114 | 1,037 |
| Dones | 2004 | 1 | 1,224 | 1,224 | 1,224 | 1,224 | 1,224 | 1,048 | 1,224 | 1,048 |
| Dones | 2004 | 1 | 1,225 | 1,225 | 1,225 | 1,225 | 1,225 | 1,049 | 1,225 | 1,049 |
| Dones | 2004 | 1 | 1,250 | 1,250 | 1,250 | 1,250 | 1,250 | 1,048 | 1,250 | 1,048 |
| Dones | 2004 | 1 | 1,348 | 1,348 | 1,348 | 1,348 | 1,348 | 1,119 | 1,348 | 1,119 |
| Dones | 2004 | 1 | 1,500 | 1,500 | 1,500 | 1,500 | 1,500 | 1,035 | 1,500 | 1,035 |
| Dones | 2004 | 1 | 1,689 | 1,689 | 1,689 | 1,689 | 1,689 | 988   | 1,689 | 988   |
| Dones | 2004 | 2 | 839   | 839   | 839   | 839   | 839   | 949   | 839   | 949   |
| Dones | 2004 | 3 | 1,063 | 1,063 | 1,063 | 1,063 | 1,063 | 1,168 | 1,063 | 1168  |
| Dones | 2004 | 4 | 1,059 | 1,059 | 1,059 | 1,059 | 1,059 | 845   | 1,059 | 845   |
| Dones | 2007 | 1 | 980   | 980   | 980   | 980   | 1,118 | 1,090 | 980   | 1,090 |
| Dones | 2007 | 1 | 1,016 | 1,016 | 1,016 | 1,016 | 1,102 | 1,086 | 1,016 | 1,086 |
| Dones | 2007 | 1 | 986   | 986   | 986   | 986   | 1,044 | 1,018 | 986   | 1,018 |
| Dones | 2007 | 1 | 1,027 | 1,027 | 1,027 | 1,027 | 1,079 | 1,052 | 1,027 | 1,052 |
| Dones | 2007 | 1 | 1,091 | 1,091 | 1,091 | 1,091 | 1,107 | 1,100 | 1,091 | 1,100 |
| Dones | 2007 | 1 | 1,076 | 1,076 | 1,076 | 1,076 | 1,094 | 1,078 | 1,076 | 1,078 |
| Dones | 2007 | 1 | 1,099 | 1,099 | 1,099 | 1,099 | 1,102 | 1,086 | 1,099 | 1,086 |
| Dones | 2007 | 1 | 1,078 | 1,078 | 1,078 | 1,078 | 1,075 | 1,059 | 1,078 | 1,059 |
| Dones | 2007 | 1 | 1,067 | 1,067 | 1,067 | 1,067 | 1,070 | 1,043 | 1,067 | 1,043 |
| Dones | 2007 | 1 | 1,095 | 1,095 | 1,095 | 1,095 | 1,107 | 1,057 | 1,095 | 1,057 |
| Dones | 2007 | 1 | 1,144 | 1,144 | 1,144 | 1,144 | 1,074 | 1,058 | 1,144 | 1,058 |
| Dones | 2007 | 1 | 1,056 | 1,056 | 1,056 | 1,056 | 1,100 | 969   | 1,056 | 969   |
| Dones | 2007 | 1 | 1,078 | 1,078 | 1,078 | 1,078 | 1,094 | 956   | 1,078 | 956   |
| Dones | 2007 | 1 | 1,110 | 1,110 | 1,110 | 1,110 | 1,101 | 962   | 1,110 | 962   |
| Dones | 2007 | 1 | 1,168 | 1,168 | 1,168 | 1,168 | 1,096 | 958   | 1,168 | 958   |
| Dones | 2007 | 1 | 1,297 | 1,297 | 1,297 | 1,297 | 1,080 | 1,064 | 1,297 | 1,064 |
| Dones | 2007 | 1 | 1,310 | 1,310 | 1,310 | 1,310 | 1,097 | 1,070 | 1,310 | 1,070 |
| Dones | 2007 | 1 | 1,189 | 1,189 | 1,189 | 1,189 | 1,090 | 952   | 1,189 | 952   |

|           |      |   |       |       |       |       |       |       |       |       |
|-----------|------|---|-------|-------|-------|-------|-------|-------|-------|-------|
| Dones     | 2007 | 1 | 1,217 | 1,217 | 1,217 | 1,217 | 1,139 | 968   | 1,217 | 968   |
| Dones     | 2007 | 1 | 1,251 | 1,251 | 1,251 | 1,251 | 1,143 | 954   | 1,251 | 954   |
| Dones     | 2007 | 1 | 1,294 | 1,294 | 1,294 | 1,294 | 1,287 | 962   | 1,294 | 962   |
| Dones     | 2007 | 1 | 1,342 | 1,342 | 1,342 | 1,342 | 1,132 | 962   | 1,342 | 962   |
| Dones     | 2007 | 1 | 1,392 | 1,392 | 1,392 | 1,392 | 1,100 | 962   | 1,392 | 962   |
| Dones     | 2007 | 1 | 1,407 | 1,407 | 1,407 | 1,407 | 1,120 | 952   | 1,407 | 952   |
| Dones     | 2007 | 1 | 1,689 | 1,689 | 1,689 | 1,689 | 1,108 | 969   | 1,689 | 969   |
| Dones     | 2008 | 2 | 842   | 842   | 842   | 842   | 951   | 934   | 842   | 934   |
| Dones     | 2008 | 2 | 920   | 920   | 920   | 920   | 1,039 | 848   | 920   | 848   |
| Dones     | 2008 | 4 | 934   | 934   | 934   | 934   | 1,009 | 754   | 934   | 754   |
| Dones     | 2004 | 1 | 1,048 | 1,048 | 1,048 | 1,048 | 1,048 | 1,062 | 1,048 | 1,062 |
| Dyncorp   | 1995 | 1 | 1,201 | 1,201 | 1,201 | 1,201 | 1,188 | 1,033 | 1,201 | 1,033 |
| Eur. Com. | 1995 | 1 | 970   | 970   | 970   | 970   | 1,077 | 1,066 | 970   | 1,066 |
| Eur. Com. | 1995 | 1 | 982   | 982   | 982   | 982   | 1,090 | 1,072 | 982   | 1,072 |
| Eur. Com. | 1995 | 1 | 1,169 | 1,169 | 1,169 | 1,169 | 1,301 | 1,210 | 1,169 | 1,210 |
| Eur. Com. | 1995 | 1 | 1,150 | 1,150 | 1,150 | 1,150 | 1,176 | 955   | 1,150 | 955   |
| Eur. Com. | 1995 | 2 | 833   | 833   | 833   | 833   | 932   | 924   | 833   | 924   |
| Eur. Com. | 1995 | 3 | 972   | 972   | 972   | 972   | 1,141 | 1,366 | 972   | 1,366 |
| Eur. Com. | 1995 | 3 | 972   | 972   | 972   | 972   | 1,141 | 1,366 | 972   | 1,366 |
| Eur. Com. | 1995 | 3 | 1,014 | 1,014 | 1,014 | 1,014 | 1,136 | 1,353 | 1,014 | 1,353 |
| Eur. Com. | 1995 | 3 | 1,079 | 1,079 | 1,079 | 1,079 | 1,122 | 1,337 | 1,079 | 1,337 |
| Eur. Com. | 1999 | 1 | 936   | 936   | 936   | 936   | 1,004 | 981   | 936   | 981   |
| Eur. Com. | 1999 | 1 | 980   | 980   | 980   | 980   | 1,216 | 1,014 | 980   | 1,014 |
| Eur. Com. | 1999 | 1 | 1,085 | 1,085 | 1,085 | 1,085 | 1,164 | 1,123 | 1,085 | 1,123 |
| Eur. Com. | 1999 | 1 | 967   | 967   | 967   | 967   | 997   | 980   | 967   | 980   |
| Eur. Com. | 1999 | 1 | 1,026 | 1,026 | 1,026 | 1,026 | 960   | 943   | 1,026 | 943   |
| Fiashci   | 2002 | 2 | 914   | 914   | 914   | 914   | 1,066 | 1,048 | 914   | 1,048 |
| Friedrich | 1994 | 1 | 1,290 | 1,191 | 1,290 | 1,290 | 1,370 | 1,336 | 1,191 | 1,233 |
| Friedrich | 1994 | 1 | 1,175 | 1,175 | 1,175 | 1,175 | 1,202 | 974   | 1,175 | 974   |
| Froese    | 2010 | 3 | 1,030 | 1,030 | 1,030 | 1,030 | 969   | 1,043 | 1,030 | 1,043 |

|           |      |   |       |       |       |       |       |       |       |       |
|-----------|------|---|-------|-------|-------|-------|-------|-------|-------|-------|
| Gorokhov  | 2000 | 2 | 796   | 796   | 796   | 796   | 822   | 878   | 796   | 878   |
| Hartmann  | 1999 | 1 | 931   | 947   | 931   | 931   | 1,134 | 1,047 | 947   | 1,065 |
| Heller    | 2004 | 1 | 978   | 978   | 978   | 978   | 932   | 978   | 978   | 978   |
| Hondo     | 2005 | 1 | 975   | 975   | 975   | 975   | 1,090 | 1,024 | 975   | 1,024 |
| Koornneef | 2008 | 1 | 1,092 | 1,087 | 1,092 | 1,092 | 1,080 | 1,043 | 1,087 | 1,038 |
| Koornneef | 2008 | 4 | 837   | 833   | 837   | 837   | 963   | 825   | 833   | 821   |
| Kreith    | 1990 | 3 | 1,041 | 1,041 | 1,041 | 1,104 | 1,041 | 1,068 | 1,104 | 1,132 |
| Krewitt   | 1997 | 1 | 911   | 911   | 911   | 911   | 1,104 | 1,085 | 911   | 1,085 |
| Krewitt   | 1997 | 1 | 1,061 | 1,061 | 1,061 | 1,061 | 1,201 | 975   | 1,061 | 975   |
| Lee       | 2004 | 1 | 1,001 | 1,001 | 961   | 1,064 | 1,108 | 984   | 1,023 | 1,006 |
| Lee       | 2004 | 1 | 1,155 | 1,155 | 1,108 | 1,217 | 1,093 | 954   | 1,171 | 968   |
| Lenzen    | 2006 | 1 | 843   | 843   | 818   | 843   | 843   | 980   | 818   | 950   |
| Lenzen    | 2006 | 1 | 911   | 911   | 865   | 911   | 1,003 | 969   | 865   | 921   |
| Lenzen    | 2006 | 1 | 941   | 941   | 894   | 941   | 999   | 969   | 894   | 921   |
| Lenzen    | 2006 | 1 | 1,011 | 1,011 | 981   | 1,011 | 918   | 961   | 981   | 932   |
| Lenzen    | 2006 | 1 | 1,170 | 1,170 | 1,065 | 1,170 | 1,170 | 983   | 1,065 | 894   |
| Lenzen    | 2006 | 1 | 1,175 | 1,175 | 1,116 | 1,175 | 1,044 | 963   | 1,116 | 915   |
| Lenzen    | 2006 | 1 | 1,506 | 1,506 | 1,370 | 1,506 | 1,190 | 966   | 1,370 | 879   |
| Lenzen    | 2006 | 4 | 716   | 716   | 680   | 716   | 811   | 768   | 680   | 729   |
| Lenzen    | 2006 | 4 | 774   | 774   | 751   | 774   | 821   | 757   | 751   | 734   |
| Lenzen    | 2006 | 4 | 788   | 788   | 749   | 788   | 809   | 768   | 680   | 730   |
| Lenzen    | 2006 | 4 | 863   | 863   | 820   | 863   | 886   | 769   | 820   | 731   |
| Lenzen    | 2006 | 4 | 1,046 | 1,046 | 952   | 1,046 | 1,040 | 820   | 952   | 746   |
| Markewitz | 2009 | 1 | 732   | 732   | 732   | 732   | 949   | 964   | 732   | 964   |
| Markewitz | 2009 | 1 | 783   | 783   | 783   | 783   | 950   | 965   | 783   | 965   |
| Markewitz | 2009 | 1 | 790   | 790   | 790   | 790   | 991   | 940   | 790   | 940   |
| Markewitz | 2009 | 1 | 861   | 861   | 861   | 861   | 948   | 963   | 861   | 963   |
| Markewitz | 2009 | 1 | 858   | 858   | 858   | 858   | 993   | 942   | 858   | 942   |
| Markewitz | 2009 | 1 | 977   | 977   | 977   | 977   | 994   | 943   | 977   | 943   |
| Markewitz | 2009 | 4 | 687   | 687   | 687   | 687   | 841   | 765   | 687   | 765   |

|            |       |   |       |       |       |       |       |       |       |       |
|------------|-------|---|-------|-------|-------|-------|-------|-------|-------|-------|
| Markewitz  | 2009  | 4 | 732   | 732   | 732   | 732   | 878   | 745   | 732   | 745   |
| Martin     | 1997  | 1 | 1,177 | 1,177 | 1,177 | 1,177 | 1,177 | 1,013 | 1,177 | 1,013 |
| May        | 2003  | 1 | 1,035 | 1,035 | 1,015 | 1,035 | 966   | 986   | 1,015 | 966   |
| May        | 2003  | 1 | 1,100 | 1,100 | 1,078 | 1,100 | 1,026 | 1,028 | 1,078 | 1008  |
| May        | 2003  | 1 | 1,215 | 1,215 | 1,190 | 1,215 | 929   | 960   | 1,190 | 941   |
| May        | 2003  | 2 | 675   | 675   | 661   | 675   | 863   | 877   | 661   | 860   |
| May        | 2003  | 2 | 751   | 751   | 736   | 751   | 905   | 916   | 736   | 897   |
| May        | 2003  | 2 | 725   | 725   | 710   | 725   | 927   | 854   | 710   | 837   |
| Meier      | 2005  | 1 | 1,006 | 1,006 | 1,006 | 1,006 | 1,006 | 981   | 1,006 | 981   |
| Meier      | 2005  | 1 | 1,044 | 1,044 | 1,044 | 1,044 | 1,044 | 981   | 1,044 | 981   |
| Meridian   | 1989  | 1 | 1,058 | 1,058 | 1,058 | 1,121 | 1,058 | 934   | 1,121 | 989   |
| Meridian   | 1989  | 2 | 824   | 824   | 824   | 886   | 793   | 833   | 886   | 896   |
| Meridian   | 1989  | 3 | 1,057 | 1,057 | 1,057 | 1,120 | 1,057 | 1,036 | 1,120 | 1,098 |
| NETL       | 2010a | 1 | 1,109 | 1,109 | 1,028 | 1,109 | 1,148 | 1,022 | 948   | 948   |
| NETL       | 2010b | 2 | 931   | 931   | 863   | 931   | 946   | 920   | 852   | 852   |
| NETL       | 2010c | 4 | 943   | 943   | 874   | 943   | 962   | 807   | 748   | 748   |
| Odeh       | 2008a | 1 | 990   | 990   | 990   | 990   | 979   | 1,046 | 990   | 1,046 |
| Odeh       | 2008b | 1 | 984   | 984   | 984   | 984   | 982   | 1,274 | 984   | 1,274 |
| Odeh       | 2008b | 2 | 861   | 861   | 861   | 861   | 806   | 1,043 | 861   | 1,043 |
| Odeh       | 2008b | 4 | 879   | 879   | 879   | 879   | 871   | 1,009 | 879   | 1,009 |
| ORNL       | 1994  | 1 | 1,013 | 1,013 | 1,013 | 1,076 | 988   | 934   | 1,076 | 991   |
| ORNL       | 1994  | 1 | 1,053 | 1,053 | 1,053 | 1,116 | 1,027 | 934   | 1,116 | 989   |
| ORNL       | 1994  | 4 | 748   | 748   | 748   | 810   | 748   | 739   | 810   | 801   |
| Pacca      | 2003  | 1 | 714   | 714   | 714   | 714   | 714   | 972   | 714   | 972   |
| Peiu       | 2007  | 1 | 1,546 | 1,546 | 1,546 | 1,546 | 1,546 | 974   | 1,546 | 974   |
| Ruether    | 2004  | 2 | 838   | 841   | 838   | 838   | 874   | 867   | 841   | 870   |
| San Martin | 1989  | 1 | 964   | 964   | 964   | 1,027 | 964   | 934   | 1,027 | 995   |
| San Martin | 1989  | 2 | 751   | 751   | 751   | 813   | 751   | 833   | 813   | 903   |
| San Martin | 1989  | 3 | 963   | 963   | 963   | 1,025 | 963   | 1,035 | 1,025 | 1,103 |
| Schreiber  | 2009  | 4 | 753   | 753   | 753   | 753   | 921   | 838   | 753   | 838   |

|           |      |   |       |       |       |       |       |       |       |       |
|-----------|------|---|-------|-------|-------|-------|-------|-------|-------|-------|
| Schreiber | 2009 | 4 | 802   | 802   | 802   | 802   | 922   | 838   | 802   | 838   |
| Schreiber | 2009 | 4 | 872   | 872   | 872   | 872   | 937   | 837   | 872   | 837   |
| SECDA     | 1994 | 1 | 1,266 | 1,266 | 1,266 | 1,266 | 1,172 | 1,043 | 1,266 | 1,043 |
| SECDA     | 1994 | 1 | 1,275 | 1,275 | 1,275 | 1,275 | 1,180 | 1,043 | 1,275 | 1,043 |
| SECDA     | 1994 | 1 | 1,288 | 1,288 | 1,288 | 1,288 | 1,192 | 1,052 | 1,288 | 1,052 |
| SECDA     | 1994 | 1 | 1,463 | 1,463 | 1,463 | 1,463 | 1,213 | 1,042 | 1,463 | 1,042 |
| SECDA     | 1994 | 2 | 1,130 | 1,130 | 1,130 | 1,130 | 1,082 | 932   | 1,130 | 932   |
| SECDA     | 1994 | 3 | 1,249 | 1,249 | 1,249 | 1,249 | 1,069 | 1,157 | 1,249 | 1,157 |
| SENES     | 2005 | 2 | 974   | 974   | 974   | 974   | 858   | 1,079 | 974   | 1,079 |
| Shukla    | 2007 | 1 | 1,371 | 1,371 | 1,371 | 1,371 | 1,371 | 981   | 1,371 | 981   |
| Spath     | 1999 | 1 | 760   | 760   | 760   | 760   | 900   | 983   | 760   | 983   |
| Spath     | 1999 | 1 | 962   | 962   | 962   | 962   | 951   | 1,008 | 962   | 1,008 |
| Spath     | 1999 | 1 | 1,045 | 1,045 | 1,045 | 1,045 | 946   | 1,005 | 1,045 | 1,005 |
| Spath     | 2004 | 1 | 847   | 847   | 847   | 847   | 847   | 985   | 847   | 985   |
| Styles    | 2007 | 1 | 990   | 990   | 990   | 990   | 990   | 959   | 990   | 959   |
| Uchiyama  | 1996 | 1 | 990   | 990   | 990   | 990   | 1,138 | 1,023 | 990   | 1,023 |
| Uchiyama  | 1996 | 2 | 858   | 858   | 858   | 858   | 1,012 | 910   | 858   | 910   |
| Uchiyama  | 1996 | 4 | 895   | 895   | 895   | 895   | 1,005 | 812   | 895   | 812   |
| White     | 1998 | 1 | 974   | 974   | 974   | 1037  | 882   | 950   | 1,037 | 1,011 |
| Wibberley | 2000 | 1 | 932   | 932   | 932   | 932   | 995   | 961   | 932   | 961   |
| Wibberley | 2000 | 2 | 767   | 767   | 767   | 767   | 886   | 861   | 767   | 861   |
| Wibberley | 2000 | 3 | 803   | 803   | 803   | 803   | 920   | 1,069 | 803   | 1,069 |
| Wibberley | 2000 | 4 | 842   | 842   | 842   | 842   | 882   | 762   | 842   | 762   |
| Wibberley | 2001 | 1 | 1,000 | 1,000 | 1,000 | 1,000 | 1,056 | 961   | 1,000 | 961   |
| Wibberley | 2001 | 1 | 1,025 | 1,025 | 1,025 | 1,025 | 1,091 | 961   | 1,025 | 961   |
| Wibberley | 2001 | 1 | 1,052 | 1,052 | 1,052 | 1,052 | 1,111 | 962   | 1,052 | 962   |
| Wibberley | 2001 | 1 | 1,144 | 1,144 | 1,144 | 1,144 | 1,184 | 953   | 1,144 | 953   |
| Wibberley | 2001 | 3 | 850   | 850   | 850   | 850   | 966   | 1,058 | 850   | 1,058 |
| Wibberley | 2001 | 4 | 910   | 910   | 910   | 910   | 986   | 770   | 910   | 770   |
| Wibberley | 2001 | 4 | 944   | 944   | 944   | 944   | 895   | 755   | 944   | 755   |



|           |      |   |       |       |       |       |       |       |       |       |
|-----------|------|---|-------|-------|-------|-------|-------|-------|-------|-------|
| Wibberley | 2001 | 4 | 982   | 982   | 982   | 982   | 984   | 771   | 982   | 771   |
| Zerlia    | 2003 | 4 | 830   | 830   | 830   | 830   | 913   | 786   | 830   | 786   |
| Zerlia    | 2003 | 4 | 910   | 910   | 910   | 910   | 1,001 | 861   | 910   | 861   |
| Zhang     | 2007 | 1 | 1,180 | 1,180 | 1,180 | 1,180 | 1,180 | 975   | 1,180 | 975   |
| Zhang     | 2007 | 1 | 1,410 | 1,410 | 1,410 | 1,410 | 1,351 | 1,023 | 1,410 | 1,023 |
| Zhang     | 2010 | 1 | 1,001 | 1,001 | 1,001 | 1,001 | 990   | 994   | 1,001 | 994   |
| Zhang     | 2010 | 1 | 1,194 | 1,194 | 1,194 | 1,194 | 1,114 | 970   | 1,194 | 970   |

Abbreviations: Pub. Year = year of publication of the reference; Tech. 1 = subcritical pulverized coal combustion, Tech. 2 = integrated gasification combined cycle, Tech. 3 = fluidized bed coal combustion, Tech. 4 = supercritical pulverized coal combustion. GWP = global warming potential; T&D = transmission and distribution. “System – All Parameters” applies all system harmonization steps. “Cumulative – All Parameters” applies system harmonization followed by technical harmonization. Harmonized estimates for thermal efficiency, CEF, and cumulative - all parameters are calculated using technology-specific harmonization factors. Refer to Table 1 in the article for additional scenario parameters and section 2.2 for the harmonization approach. See article for full bibliographic information for each cited reference.

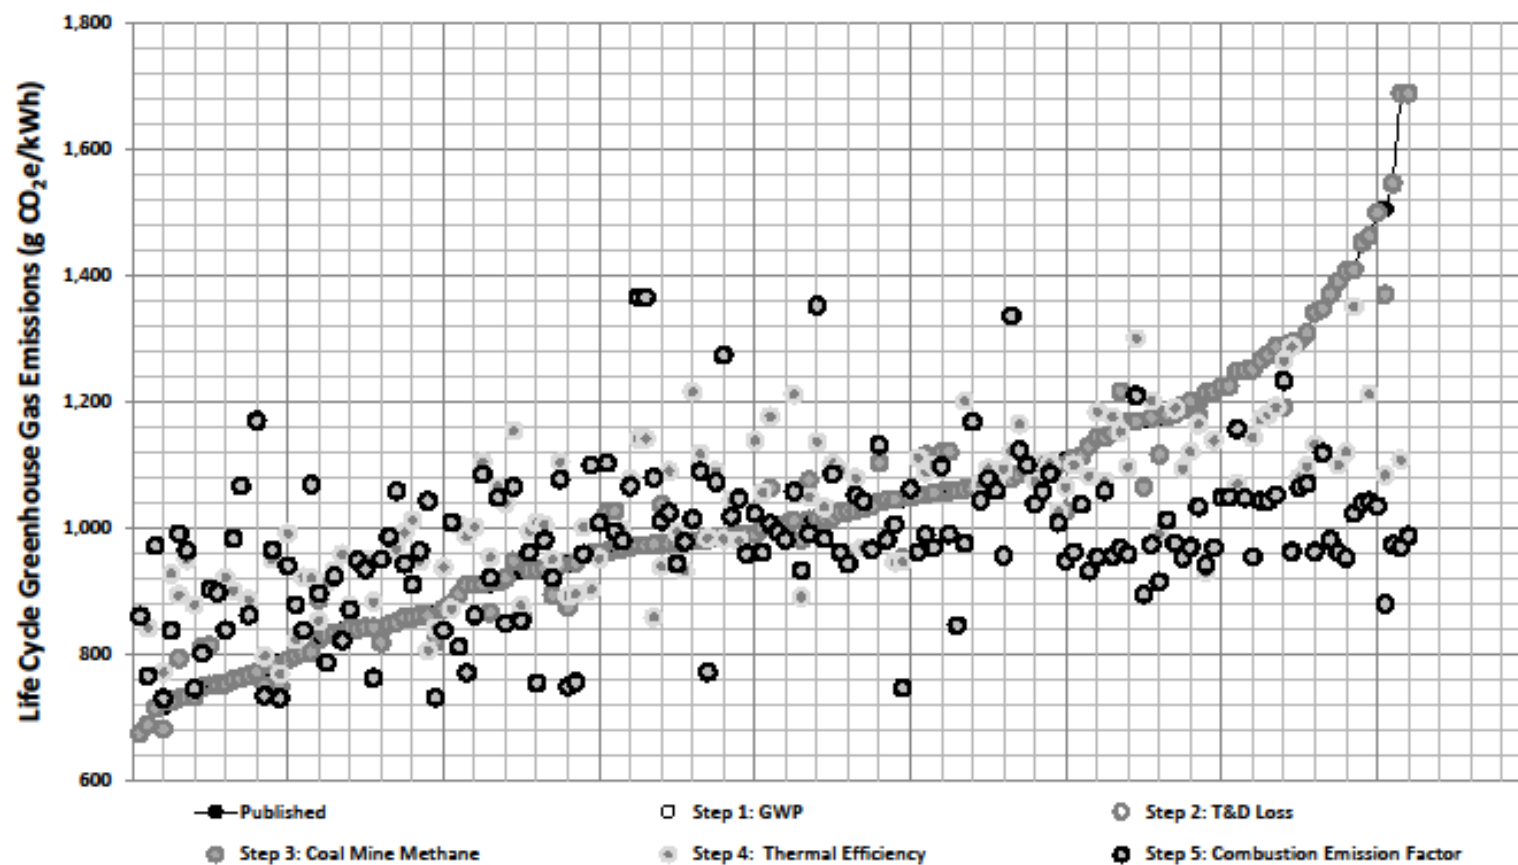

**Figure S1.** Results of the application of successive harmonization steps to the published dataset, rank ordered from least to greatest life cycle greenhouse gas emissions estimate. Technology-specific harmonization factors were used for thermal efficiency and combustion CO<sub>2</sub> emission factor harmonization. GWP = global warming potential; T&D = transmission and distribution.

**Table S3.** Changes to measures of central tendency and variability from application of individual harmonization steps and from the cumulative application of all harmonization parameters based on collective harmonization (i.e., using the same value for each harmonization parameter applied to all coal combustion technologies) (all values reported in grams CO<sub>2</sub>e/kWh)

| Technology          | Metric               | Published | Harmonization Steps |             |                           |                       |                                                      |                               |                                |
|---------------------|----------------------|-----------|---------------------|-------------|---------------------------|-----------------------|------------------------------------------------------|-------------------------------|--------------------------------|
|                     |                      |           | GWP                 | T&D<br>Loss | Coal<br>Mining<br>Methane | Thermal<br>Efficiency | Combusti<br>on CO <sub>2</sub><br>Emission<br>Factor | System -<br>All<br>Parameters | Cumulative<br>- All Parameters |
| All<br>Technologies | Mean                 | 1,026     | 1,030               | 1,020       | 1,030                     | 1,150                 | 1,060                                                | 1,020                         | 1,050                          |
|                     | Std dev              | 199       | 200                 | 200         | 200                       | 110                   | 80                                                   | 200                           | 80                             |
|                     | Minimum              | 675       | 670                 | 660         | 670                       | 940                   | 970                                                  | 660                           | 910                            |
|                     | 25th percentile      | 891       | 890                 | 870         | 890                       | 1,070                 | 1,000                                                | 870                           | 1,000                          |
|                     | Median               | 1,001     | 1,000               | 990         | 1,010                     | 1,160                 | 1,020                                                | 1,010                         | 1,030                          |
|                     | 75th percentile      | 1,134     | 1,130               | 1,110       | 1,130                     | 1,220                 | 1,090                                                | 1,120                         | 1,090                          |
|                     | Maximum              | 1,689     | 1,690               | 1,690       | 1,690                     | 1,470                 | 1,390                                                | 1,690                         | 1,330                          |
|                     | IQR Magnitude        | 243       | 240                 | 240         | 240                       | 150                   | 90                                                   | 250                           | 90                             |
|                     | Range                | 1,014     | 1,010               | 1,030       | 1,010                     | 520                   | 420                                                  | 1,030                         | 410                            |
|                     | Change in mean       | —         | <-5%                | <-5%        | <5%                       | 12%                   | <5%                                                  | <-5%                          | <5%                            |
|                     | Change in<br>median  | —         | <5%                 | <-5%        | <5%                       | 16%                   | <5%                                                  | <5%                           | <5%                            |
|                     | Change in std<br>dev | —         | <-5%                | <-5%        | <-5%                      | -47%                  | -61%                                                 | <-5%                          | -61%                           |
|                     | Change in IQR        | —         | <5%                 | <-5%        | <-5%                      | -38%                  | -63%                                                 | <5%                           | -61%                           |
|                     | Change in range      | —         | <5%                 | <5%         | <5%                       | -48%                  | -58%                                                 | <5%                           | -59%                           |
|                     | Estimates            | 164       | 71                  | 164         | 164                       | 133                   | 164                                                  | 164                           | 164                            |

| References                                                                                                                                                                                                                                                                                                                                                                                                                                                                                                                                                                                                                                                                                                                                                                                                                                                                                                                                                                                                                                                                                                                                                                                                                                                                                                                                                                                                                                                                                                                                                                                                                                                                                                                                                                                                    | 53 | 19 | 53 | 53 | 38 | 53 | 53 | 53 |
|---------------------------------------------------------------------------------------------------------------------------------------------------------------------------------------------------------------------------------------------------------------------------------------------------------------------------------------------------------------------------------------------------------------------------------------------------------------------------------------------------------------------------------------------------------------------------------------------------------------------------------------------------------------------------------------------------------------------------------------------------------------------------------------------------------------------------------------------------------------------------------------------------------------------------------------------------------------------------------------------------------------------------------------------------------------------------------------------------------------------------------------------------------------------------------------------------------------------------------------------------------------------------------------------------------------------------------------------------------------------------------------------------------------------------------------------------------------------------------------------------------------------------------------------------------------------------------------------------------------------------------------------------------------------------------------------------------------------------------------------------------------------------------------------------------------|----|----|----|----|----|----|----|----|
| <p>Harmonized values are rounded to two significant digits if less than 1,000 and three significant digits if equal to or greater than 1,000. Percentages are rounded to the nearest whole number as an indication of uncertainty.</p> <p>The cutoff for significance for change in measures of central tendency and variability is set at 5%.</p> <p>Percent change for harmonized values compared with published estimates calculated prior to rounding and then reported to the nearest whole percent.</p> <p>“Estimates” and “References” indicates the number of independent studies and published GHG emission estimates that were harmonized in each step (respectively).</p> <p>The statistics reported for each step refer to the full population for that technology including both harmonized and un-harmonized estimates.</p> <p>Harmonized estimates for thermal efficiency, CEF, and cumulative - all parameters are calculated using technology-specific harmonization factors.</p> <p>The “All Technologies” category reports statistical results across all four evaluated technologies when technology-specific harmonization factors are used.</p> <p>“System – All Parameters” applies all system harmonization steps. “Cumulative – All Parameters” applies system harmonization followed by technical harmonization.</p> <p>Refer to the “Limitations of the Analysis” section of the text for a discussion of reasons for interpreting the distributional statistics reported in this article with caution based on the characteristics of the pool of available studies and estimates.</p> <p>Abbreviations: Std dev = standard deviation; IQR Magnitude = interquartile range (75th – 25th percentile); GWP = global warming potential; T&amp;D = transmission and distribution.</p> |    |    |    |    |    |    |    |    |

### **Relative Contributions of Carbon Dioxide, Methane, and Nitrous Oxide to Life Cycle GHG Emissions**

Of the 53 references that passed the second screen, 15 references both included coal mine methane emissions in their analyses and comprehensively disaggregated and reported carbon dioxide, methane, and nitrous oxide throughout the life cycle to yield a dataset of 54 independent estimates of each GHG's contribution to total GWP. Considering all evaluated coal combustion technologies together, median contributions of each GHG to total GHG emissions on a carbon dioxide equivalent ( $\text{CO}_2\text{e}$ ) basis were:  $\text{CO}_2 = 96\%$  (IQR = 91-99%),  $\text{CH}_4 = 3\%$  (IQR = 1-7%), and  $\text{N}_2\text{O} = <1\%$  (IQR = 0-1%). The median of the published GHG emissions for these 15 references was 1,078 g  $\text{CO}_2\text{e}/\text{kWh}$  (IQR = 981-1,184 g  $\text{CO}_2\text{e}/\text{kWh}$ ). The median of the combined contribution of methane and nitrous oxide for these 15 references in absolute terms was 45 g  $\text{CO}_2\text{e}/\text{kWh}$  (IQR = 14-96 g  $\text{CO}_2\text{e}/\text{kWh}$ ) or about 4% of the evaluated dataset mean. Note that this subset of the evaluated literature was different than the subset analyzed to estimate coal mine methane emissions leading to different median estimates of relative methane contributions to total life cycle GHG emissions.

This dataset of disaggregated GHG emission contributions showed significant variability in the contribution of each GHG. For example, some studies of lignite coal generation with minimal coal mine methane emissions yielded estimated life cycle methane contributions of less than 1% of total GHG emissions (Dones 2007; European Commission 1995; May and Brennan 2003). Other studies of particularly gaseous hard coal mines resulted in life cycle methane emission contribution estimates of 10% to 20% of the total GHG emissions (Friedrich 1994; Hartmann 1999; Dones 2007). For nitrous oxide emissions, the European Commission (1995) estimated significantly greater contributions for nitrous oxide emissions to total GHG emissions (13% to 15%) from fluidized bed (FB) coal combustion—a contribution that is greater than the nitrous oxide emission levels reported by any other reference in the evaluated dataset for the other coal combustion technologies. The European Commission, however, acknowledged that its values for nitrous oxide should be treated with “considerable skepticism,” due to lack of operational data or adequate modeling for FB technology and in the absence of other estimates for FB technologies independently confirming that level of nitrous oxide contribution (European Commission 1995).

Consequently, the European Commission estimates for nitrous oxide contributions to total GHG emissions for FB combustion were excluded from the evaluation reported in this section.

The harmonization process used for the present study added 63 g CO<sub>2</sub>e/kWh to the total GHG emissions of those estimates that did not include coal mine methane emissions, representing about 6% of the median of the dataset harmonized by all parameters. The study made no assumptions regarding whether a particular technology type was more likely to obtain coal from mines with high or low coal mine methane emission levels, and also did not harmonize independently for nitrous oxide emissions. The addition of 63 g CO<sub>2</sub>e/kWh to the GHG emission estimates of those studies that did not include coal mine methane, however, should approximately account for the omitted non-carbon-dioxide GHG emissions, based on the results of the GHG contribution analysis. Minor deviations in actual non-CO<sub>2</sub> GHG emissions for the 14 scenarios to which the coal mine methane emissions were added from the assumed value of 63 g CO<sub>2</sub>e/kWh were not expected to significantly alter the conclusions of the harmonization process.

### Screened References

For transparency, citations for all references reviewed as part of the screening process are included in this section. The references are divided into those that passed all screens, failed secondary screening, and failed primary screening.

#### Passed All Screens (n=53)

- Akai, M., N. Nomura, H. Waku, and M. Inoue. 1997. Life-cycle analysis of a fossil-fuel power plant with CO<sub>2</sub> recovery and a sequestering system. International Symposium on CO<sub>2</sub> Fixation and Efficient Utilization of Energy. *Energy* 22(2–3): 249–255
- Bates, J. L. 1995. *Full fuel cycle atmospheric emissions and global warming impacts from UK electricity generation*. London: ETSU.

- Cottrell, A., J. Nunn, A. Urfer, and L. Wibberley. 2003. *Systems assessment of electricity generation using biomass and coal in CFBC*. Australia: Cooperative Research Centre for Coal in Sustainable Development.
- Damen, K. and A. P. C. Faaij. 2003. *A life cycle inventory of existing biomass import chains for "green" electricity production*. The Netherlands: Utrecht University, Copernicus Institute, Department of Science, Technology and Society.
- Dolan, S. L. 2007. Life cycle assessment and emergy synthesis of a theoretical offshore wind farm for Jacksonville, Florida. Master's thesis, University of Florida.
- Dones, R., U. Ganter, S. Hirschberg. 1999. Environmental inventories for future electricity supply systems for Switzerland. *International Journal of Global Energy Issues* 12(1): 271–282.
- Dones, R., X. Zhou, C. Tian. 2004. Life cycle assessment (LCA) of Chinese energy chains for Shandong electricity scenarios. *International Journal of Global Energy Issues* 22(2–4): 199–224.
- Dones, R., C. Bauer, R. Bolliger, B. Burger, M. Faist Emmenegger, R. Frischknecht, T. Heck, N. Jungbluth, and A. Röder. 2007. *Life cycle inventories of energy systems: Results for current systems in Switzerland and other UCTE countries*. EcoInvent Report No. 5.
- Dones, R., C. Bauer, T. Heck, O. Mayer-Spohn, M. Blesl. 2008. *Life cycle assessment of future fossil technologies with and without carbon capture and storage*. Boston, MA: Materials Research Society. 1041: 147–158.
- DynCorp EENSP Inc. 1995. Assessment of the environmental benefits of renewables deployment: A total fuel cycle analysis of the greenhouse gas impacts of renewable generation. Golden, CO: National Renewable Energy Laboratory.
- European Commission (Eur. Com.), Directorate-General XII. 1995. *ExternE Project: Externalities of Energy. Report 3, Coal and Lignite Fuel Cycles*.
- European Commission (Eur. Com.), Directorate-General XII. 1999. *ExternE: Externalities of Energy. Volume 20, National Implementation*. p. 534.

- Fiaschi, D. and L. Lombardi. 2002. Integrated gasifier combined cycle plant with integrated CO<sub>2</sub>-H<sub>2</sub>S removal: Performance analysis, life cycle assessment and exergetic life cycle assessment. *International Journal of Applied Thermodynamics* 5(1): 13–24.
- Friedrich, R. and T. Marheineke. 1994. Life cycle analysis of electric systems: Methods and results. Presented at IAEA advisory group meeting on analysis of net energy balance and full-energy-chain greenhouse gas emissions for nuclear and other energy systems, 4–7 October, Beijing, China. International Atomic Energy Agency.
- Froese, R. E., D. R. Shonnard, C.A. Miller, K.P. Koers, and D.M. Johnson. 2010. An evaluation of greenhouse gas mitigation options for coal-fired power plants in the US Great Lakes States. *Biomass and Bioenergy* 34(3): 251–262.
- Gorokhov, V., L. Manfredo, M. Ramezan, and J. Ratafia-Brown. 2000. *Life Cycle Assessment of IGCC: Systems Phase II Report*. Science Applications International Corporation (SAIC).
- Hartmann, D. and M. Kaltschmitt. 1999. Electricity generation from solid biomass via co-combustion with coal—Energy and emission balances from a German case study. *Biomass & Bioenergy* 16(6): 397–406.
- Heller, M. C., G. A. Keoleian, M. K. Mannb, and T.A. Volk. 2004. Life cycle energy and environmental benefits of generating electricity from willow biomass. *Renewable Energy* 29(7): 1023–1042.
- Hondo, H. 2005. Life cycle GHG emission analysis of power generation systems: Japanese case. *Energy* 30(11–12): 2042–2056.
- Koornneef, J., T. van Keulen, A. Faaij, and W. Turkenburg. 2008. Life cycle assessment of a pulverized coal power plant with post-combustion capture, transport and storage of CO<sub>2</sub>. *International Journal of Greenhouse Gas Control* 2(4): 448–467.
- Kreith, F., P. Norton, and D. Brown. 1990. A comparison of CO<sub>2</sub> emissions from fossil and solar power plants in the United States. *Energy* 15(12): 1181–1198.
- Krewitt, W., P. Mayerhofer, R. Friedrich, A. Trukenmüller, T. Heck, and A. Greßmann. 1997. *ExternE national implementation in Germany*. Stuttgart, Germany: IER, University of Stuttgart.
- Lee, K.-M., S.-Y. Lee, T. Hur. 2004. Life cycle inventory analysis for electricity in Korea. *Energy* 29(1): 87–101.



- Lenzen, M., C. Dey, C. Hardy, M. Bilek. 2006. *Life-cycle energy balance and greenhouse gas emissions of nuclear energy in Australia*. Report to the Prime Minister's Uranium Mining, Processing and Nuclear Energy Review (UMPNER). Sydney: ISA, The University of Sydney.
- Markewitz, P., A. Schreiber, P. Zapp, S. Vögele. 2009. Environmental impacts of a German CCS strategy. *Energy Procedia* 1(1): 3763–3770.
- Martin, J. A. 1997. A total fuel cycle approach to reducing greenhouse gas emissions: Solar generation technologies as greenhouse gas offsets in U.S. utility systems. *Solar Energy (Selected Proceeding of ISES 1995: Solar World Congress. Part IV)* 59(4–6): 195–203.
- May, J. R. and D. J. Brennan. 2003. Life cycle assessment of Australian fossil energy options. *Process Safety and Environmental Protection: Transactions of the Institution of Chemical Engineers, Part B* 81(5): 317–330.
- Meier, P. J., P. P. H. Wilson, G. Kulcinski, and P. Denholm. 2005. US electric industry response to carbon constraint: A life-cycle assessment of supply side alternatives. *Energy Policy* 33(9): 1099–1108.
- Meridian. 1989. *Energy system emissions and material requirements*. Alexandria, VA, Meridian Corporation.
- National Energy Technology Laboratory (NETL). 2010a. Life cycle analysis: Existing pulverized coal (EXPC) power plant. <http://www.netl.doe.gov/energy-analyses/refshelf/>. Accessed January 2011.
- National Energy Technology Laboratory (NETL). 2010b. Life cycle analysis: Integrated gasification combined cycle (IGCC) power plant. <http://www.netl.doe.gov/energy-analyses/refshelf/>. Accessed January 2011.
- National Energy Technology Laboratory (NETL). 2010c. Life cycle analysis: supercritical pulverized coal (SCPC) power plant. <http://www.netl.doe.gov/energy-analyses/refshelf/>. Accessed January 2011.
- Odeh, N. A. and T. T. Cockerill. 2008a. Life cycle analysis of UK coal fired power plants. *Energy Conversion and Management* 49(2): 212–220.
- Odeh, N. A. and T. T. Cockerill. 2008b. Life cycle GHG assessment of fossil fuel power plants with carbon capture and storage. *Energy Policy* 36(1): 367–380.
- Oak Ridge National Laboratory (ORNL) and R. f. t. Future. 1994. Estimating externalities of coal fuel cycles. In *External costs and benefits of fuel cycles*, edited by R. Lee. Oak Ridge, TN: Oak Ridge National Laboratory and Resources for the Future. p. 3.

- Pacca, S. A. 2003. Global warming effect applied to electricity generation technologies. PhD thesis, University of California, Berkeley, California.
- Peiu, N. 2007. Life Cycle Inventory Study of the electrical energy production in Romania. *International Journal of Life Cycle Assessment* 12(4): 225–229.
- Ruether, J. A., M. Ramezan, and P. Balash. 2004. Greenhouse gas emissions from coal gasification power generation systems. *Journal of Infrastructure Systems* 10(3): 111–119.
- San Martin, R. L. 1989. Environmental emissions from energy technology systems: The total fuel cycle. Washington, DC: U.S. Department of Energy.
- Saskatchewan Energy Conservation and Development Authority (SECDA), Technology Group. 1994. *Levelized cost and full fuel cycle environmental impacts of Saskatchewan's electric supply options*. Saskatoon, SK: Saskatchewan Energy Conservation and Development Authority.
- Schreiber, A., P. Zapp, W. Kuckshinrichs. 2009. Environmental assessment of German electricity generation from coal-fired power plants with amine-based carbon capture. *International Journal of Life Cycle Assessment* 14(6): 547–559.
- SENES Consultants Limited. 2005. *Methods to assess the impacts on the natural environment of generation options*. Richmond Hill, Ontario (Canada): Prepared by SENES Consultants for the Ontario Power Authority.
- Shukla, P. R. and D. Mahapatra. 2007. Full fuel cycle for India. *CASES: Cost Assessment of Sustainable Energy Systems*. Indian Institute of Management Ahmedabad: IIMA.
- Spath, P. L., M. K. Mann, and D. Kerr. 1999. *Life cycle assessment of coal-fired power production*. Golden, CO: National Renewable Energy Laboratory.
- Spath, P. L. and M. K. Mann. 2004. Biomass power and conventional fossil systems with and without CO<sub>2</sub> sequestration—Comparing the energy balance, greenhouse gas emissions and economics. Golden, CO: National Renewable Energy Laboratory.

- Styles, D. and M. B. Jones. 2007. Energy crops in Ireland: Quantifying the potential life-cycle greenhouse gas reductions of energy-crop electricity. *Biomass & Bioenergy* 31(11–12): 759–772.
- Uchiyama, Y. 1996. Validity of FENCH-GHG study: Methodologies and databases. Comparison of energy sources in terms of their full-energy-chain emission factors of greenhouse gases. IAEA advisory group meeting on analysis of net energy balance and full-energy-chain greenhouse gas emissions for nuclear and other energy systems, 4–7 October 1994. Beijing, China: International Atomic Energy Agency (IAEA), p. 85–94.
- White, S. W. 1998. Net energy payback and CO<sub>2</sub> emissions from 3He fusion and wind electrical power plants. PhD thesis. University of Wisconsin, Madison, Wisconsin.
- Wibberley, L., J. Nunn, A. Cottrell, M. Searles, A. Urfer, P. Scaife. 2000. Life cycle analysis for steel and electricity production in Australia. *Environmental Credentials of Coal*. Brisbane, Queensland, Australia: Australian Coal Association Research Program.
- Wibberley, L. 2001. Coal in a sustainable society. *Coal for Sustainable Development*. Brisbane, Queensland, Australia: Australian Coal Association Research Program.
- Zerlia, T. 2003. Life-cycle greenhouse gas emissions of fossil fuels in power generation: Remarks on the Italian energy scenario; Emissioni dei gas serra nel ciclo di vita dei combustibili fossili utilizzati nella produzione termoelettrica: considerazioni e ricadute sullo scenario energetico italiano. *Rivista dei Combustibili* 57(1): 3–17. (Translated to English by Assocarboni – Rome)
- Zhang, Y., S. Habibi, and H.L. MacLean. 2007. Environmental and economic evaluation of bioenergy in Ontario, Canada. *Journal of the Air and Waste Management Association* 57(8): 919–933.
- Zhang, Y. M., J. McKechnie, D. Cormier, R. Lyng, W. Mabee, A. Ogino, and H. MacLean. 2010. Life cycle emissions and cost of producing electricity from coal, natural gas, and wood pellets in Ontario, Canada. *Environmental Science & Technology* 44(1): 538–544.

### Failed Secondary Screening (n=142)

- Affolter, R. H., L. Ruppert, and S. M. Swanson. 2008. Preliminary Results of the US Geological Survey's Power Plant Cradle to Grave studies: Goals for Future Planning Source. In *33rd International Technical Conference on Coal Utilization and Fuel Systems, 1-5 Jun 2008* Clearwater, FL: Coal Technology Association.
- Audus, H. and L. Saroff. 1995. Full fuel cycle evaluation of CO<sub>2</sub> mitigation options for fossil fuel fired power plant. *Energy Conversion and Management* 36(6-9): 831-834.
- Babbitt, C. W. and A. S. Lindner. 2005. A life cycle inventory of coal used for electricity production in Florida. *Journal of Cleaner Production* 13(9): 903-912.
- Babbitt, C. W. and A. S. Lindner. 2008. A life cycle comparison of disposal and beneficial use of coal combustion products in Florida. *International Journal of Life Cycle Assessment* 13(7): 555-563.
- Beals, D. and D. Hutchinson. 1993. *Environmental Impacts of Alternative Electricity Generation Technologies*. Guelph, Ontario, Canada: Beals and Associates.
- Benetto, E., P. Rousseaux, and J. Blondin. 2004. Life cycle assessment of coal by-products based electric power production scenarios. *Fuel* 83(7-8): 957-970.
- Benetto, E., E. C. Popovici, P. Rousseaux, and J. Blondin. 2002. Life cycle assessment of coal by-products based electric power production. Paper presented at 5th International Conference on Ecobalance, Tsukuba, Japan.
- Benetto, E., E. C. Popovici, P. Rousseaux, and J. Blondin. 2004. Life cycle assessment of fossil CO<sub>2</sub> emissions reduction scenarios in coal-biomass based electricity production. *Energy Conversion and Management* 45(18-19): 3053-3074.
- Bergerson, J. 2005. Future Electricity Generation: An Economic and Environmental Life Cycle Perspective on Near-, Mid- and Long-Term Technology Options and Policy Implications thesis, Civil and Environmental

Engineering Engineering and Public Policy, Carnegie Mellon University, Carnegie Institute of Technology, Pittsburgh, PA.

Bergerson, J. and L. Lave. 2002. *A Life Cycle Analysis of Electricity Generation*

*Technologies: Health and Environmental Implications of Alternative Fuels and*

*Technologies*. Pittsburgh, PA: Carnegie Mellon Electricity Industry Center.

Bergerson, J. and L. Lave. 2005. Should we transport Coal, Gas, or Electricity: Cost,

Efficiency, and Environmental Implications. *Environmental Science and Technology* 39(16): 5905-5910.

Bergerson, J. and L. Lave. 2007. The long-term life cycle private and external costs of

high coal usage in the US. *Energy Policy* 35(12): 6225-6234.

Berry, J. E., M. R. Holland, P. R. Watkiss, R. Boyd, and W. Stephenson. 1998. *Power*

*generation and the environment—a UK perspective*. AEAT 3776. Oxfordshire, UK: AEA Technology.

Bilek, M., C. Hardy, M. Lenzen, and C. Dey. 2006. *Life Cycle Energy Balance and*

*Greenhouse Gas Emissions of Nuclear Energy in Australia*. Sydney, Australia: Institute of Sustainability Analysis, The University of Sydney.

Bjork, H. and A. Rasmuson. 1999. Life cycle assessment of an energy-system with a

superheated steam dryer integrated in a local district heat and power plant. *Drying Technology* 17(6): 1121-1134.

Bouvar, F. and A. Prieur. 2009. Comparison of life cycle GHG emissions and energy

consumption of combined electricity and H<sub>2</sub> production pathways with CCS: Selection of technologies with natural gas, coal and lignite as fuel for the European HYPOGEN Programme. *Energy Procedia* 1(1): 3779-3786.

Corrado, A., P. Fiorini, and E. Sciubba. 2006. Environmental assessment and extended

exergy analysis of a "zero CO<sub>2</sub> emission", high-efficiency steam power plant. *Energy* 31(15): 3186-3198.

Corti, A. and L. Lombardi. 2004. Biomass integrated gasification combined cycle with

- reduced CO<sub>2</sub> emissions: Performance analysis and life cycle assessment (LCA). *Energy* 29(12-15): 2109-2124.
- Di, X. H., Z. R. Nie, B. R. Yuan, and T. Y. Zuo. 2007. Life cycle inventory for electricity generation in China. *International Journal of Life Cycle Assessment* 12(4): 217-224.
- Doctor, R. D., J. C. Molburg, N. F. Brockmeier, L. manfredo, V. Gorokhov, M. Ramezan, and G. J. Stiegel. 2001. *Life-Cycle Analysis of a Shell Gasification-Based Multi-Product System with CO<sub>2</sub> Recovery*. Argonne, IL: Argonne National Laboratory.
- Domenichini, R., M. Gallio, and A. Lazzaretto. 2010. Combined production of hydrogen and power from heavy oil gasification: Pinch analysis, thermodynamic and economic evaluations. *Energy* 35(5): 2184-2193.
- Dones, R. 2004. *Life Cycle Inventories of Energy Systems: Results for Current Systems in Switzerland and other UCTE Countries*. EcoInvent Report No. 5. Swiss Centre for Life Cycle Inventories.
- Dones, R., S. Hirschberg, and I. Knoepfel. 1996. Greenhouse gas emission inventory based on full energy chain analysis. In *IAEA advisory group meeting on analysis of net energy balance and full-energy-chain greenhouse gas emissions for nuclear and other energy systems*. Beijing, China.
- Dones, R., T. Heck, and S. Hirschberg. 2004. Greenhouse gas emissions from energy systems, comparison and overview In *Encyclopedia of Energy, Volume 3*.
- Dones, R., T. Heck, C. Bauer, S. Hirschberg, P. Bickel, P. Preiss, L. I. Panis, and I. De Vlieger. 2005. *Externalities of Energy: Extension of Accounting Framework and Policy Applications*.
- Dones, R. and T. Heck. 2006. LCA-based evaluation of ecological impacts and external costs of current and new electricity and heating systems. In *Materials Research Society Symposium Proceedings. 2005 Materials Research Society Fall Meeting. 28-30 Nov. 2005*. Boston, MA, United States: Materials Research Society, Warrendale, PA
- dos Santos, M. A., L. P. Rosa, B. Sikar, E. Sikar, and E. O. dos Santos. 2006. Gross

- reservoir compared to thermo power plants. *Energy Policy* 34(4): 481-488.
- Dowaki, K., H. Ishitani, R. Matsushashi, and N. Sam. 2002. A comprehensive life cycle analysis of a biomass energy system. *Technology* 8(4-6): 193-204.
- Evans, A. and V. Strežov. 2010. A sustainability assessment of electricity generation. In *2010 International Conference on Biosciences, BioSciencesWorld 2010, March 7-13, 2010*. Cancun, Mexico: IEEE Computer Society.
- Feng, H., H. A. Gabbar, S. Tanaka, H. E. Sayed, K. Suzuki, and W. Gruver. 2007. Integrated life cycle assessment and environmental impact analysis: application to power plants. *Asia-Pacific Journal of Chemical Engineering* 2(3): 213-224.
- Fox, J. F. and J. E. Campbell. 2010. Terrestrial Carbon Disturbance from Mountaintop Mining Increases Lifecycle Emissions for Clean Coal. *Environmental Science & Technology* 44(6): 2144-2149.
- Frischknecht, R. 1998. Life Cycle Inventory Analysis for Decision-Making, thesis, Swiss Federal Institute of Technology Zurich, Zurich.
- Fthenakis, V. and H. C. Kim. 2010. Life-cycle uses of water in U.S. electricity generation. *Renewable and Sustainable Energy Reviews* In Press, Uncorrected Proof.
- Goralczyk, M. 2003. Life-Cycle Assessment in the Renewable Energy Sector. *Applied Energy* 5: 205-211.
- Gorokhov. 2002. Life Cycle Analysis of Advanced Power Generation Systems. *Technology* 8: 217-228.
- Gorokhov, V., L. Manfredo, J. Ratafia-Brown, M. Ramezan, and G. Steigel. 2000. Life Cycle Assessment of Gasification-Based Power Cycles. Paper presented at 2000 International Joint Power Generation Conference, Miami Beach, Florida.

- Gotchy, R. L. 1987. *Potential Health and Environmental Impacts Attributable to the Nuclear and Coal Fuel Cycles*. US Nuclear Regulatory Commission, Office of Nuclear Reactor Regulation.
- Grammelis, P., G. Skodras, and E. Kakaras. 2006. An economic and environmental assessment of biomass utilization in lignite-fired power plants of Greece. *International Journal of Energy Research* 30(10): 763-775.
- Haddad, S. and R. Dones. 1991. *Comparative health and environmental risks for various energy sources*. International Atomic Energy Agency.
- Hartmann, D. 1997. FENCH-analysis of electricity generation greenhouse gas emissions from solar and wind power in Germany. In *IAEA advisory group meeting on the assessment of greenhouse gas emissions from the full energy chain of solar and wind power*. Vienna, Austria: IAEA, Vienna (Austria); International Atomic Energy Agency.
- Hong, S. W. 2007. The usability of switchgrass, rice straw, and logging residue as feedstocks for power generation in East Texas thesis, Texas A&M University, College Station, Tex.
- IEA. 2002. *Environmental and Health Impacts of Electricity Generation. A Comparison of the Environmental Impacts of Hydropower with those of Other Generation Technologies*. International Energy Agency.
- IEA. 1998. *Benign Energy? The Environmental Implications of Renewables*. Paris: International Energy Agency.
- Jacobson, M. Z. 2008. Review of solutions to global warming, air pollution, and energy security. *Energy & Environmental Science* 2: 148-173.
- Jaramillo, P. 2007. A life cycle comparison of coal and natural gas for electricity generation and the production of transportation fuels thesis, Carnegie Mellon University, Pittsburgh, PA.
- Jaramillo, P., W. M. Griffin, and H. S. Matthews. 2006. Comparative Life Cycle Carbon Emissions of LNG Versus Coal and Gas for Electricity Generation.



- Jaramillo, P., W. M. Griffin, and H. S. Matthews. 2007. Comparative life-cycle air emissions of coal, domestic natural gas, LNG, and SNG for electricity generation. *Environmental Science & Technology* 41(17): 6290-6296.
- Kadam, K. L. 2002. Environmental implications of power generation via coal-microalgae cofiring. *Energy* 27(10): 905-922.
- Kaplan, P. O., J. Decarolis, and S. Thorneloe. 2009. Is it better to burn or bury waste for clean electricity generation? *Environmental Science and Technology* 43(6): 1711-1717.
- Kenny, R., C. Law, and J. M. Pearce. 2010. Towards real energy economics: Energy policy driven by life-cycle carbon emission. *Energy Policy* 38(4): 1969-1978.
- Kim, S. and B. E. Dale. 2005. Life cycle inventory information of the United States electricity system. *International Journal of Life Cycle Assessment* 10(4): 294-304.
- Kirkinen, J., T. Palosuo, K. Holmgren, and I. Savolainen. 2008. Greenhouse Impact Due to the Use of Combustible Fuels: Life Cycle Viewpoint and Relative Radiative Forcing Commitment. *Environmental management* 42(3): 458-469.
- Kivisto, A. 1995. Energy Payback Period and Carbon Dioxide Emissions in Different Power Generation Methods in Finland. In *LAEE International Conference, 1995*.
- Korre, A., Z. Nie, and S. Durucan. 2010. Life cycle modelling of fossil fuel power generation with post-combustion CO<sub>2</sub> capture. *International Journal of Greenhouse Gas Control* 4(2): 289-300.
- Kreith, F., P. Norton, and D. Brown. 1990. A Comparison of CO<sub>2</sub> Emissions from Fossil and Solar Power Plants in the United States. *Energy* 15(12): 1181-1198.
- Kuemmel, B. and B. Sørensen. 1997. *Life-cycle analysis of the total Danish energy*

- system*. Tekst Nr 334. Roskilde, Denmark: IMFUFA, Roskilde Universitetscenter.
- Lee, Y.-E. 2005. Life Cycle Assessment(Lca) of the power generation system for the establishment of environmental management system in Korea. *Key Engineering Materials* 277-279(II): 667-673.
- Leijting, J. 1999. *Fuel peat utilization in Finland: resource use and emissions*. ISBN 952-11-0428-7. Finnish Environment Institute.
- Lenzen, M. 1999. Greenhouse Gas Analysis of Solar Thermal Electricity Generation. *Solar Energy* 65(6): pp. 353-368.
- Lombardi, L. 2003. Life cycle assessment comparison of technical solutions for CO2 emissions reduction in power generation. *Energy Conversion and Management* 44(1): 93-108.
- Lund, H., B. V. Mathiesen, P. Christensen, and J. H. Schmidt. 2010. Energy system analysis of marginal electricity supply in consequential LCA. *International Journal of Life Cycle Assessment* 15(3): 260-271.
- Mann, M. K. and P. L. Spath. 1999. A Life Cycle Comparison of Electricity from Biomass and Coal Paper presented at Energy efficiency in industry; Industry & innovation in the 21st century. 1999 ACEEE summer study on energy efficiency in industry (3rd).
- Mann, M. K. and P. L. Spath. 2001. A life-cycle assessment of biomass cofiring in a coal-fired power plant. *Clean Prod Processes* 3: 81-91.
- Mann, M. K. and P. L. Spath. 1997. *Life Cycle Assessment of a Biomass Gasification Combined-Cycle System*. Golden, CO: National Renewable Energy Laboratory.
- Marriott, J. 2007. An electricity-focused economic input-output model: Life-cycle assessment and policy implications of future electricity generation scenarios thesis, Carnegie Mellon University.
- McCulloch, M., M. Raynolds, and M. Laurie. 2000. *Life-Cycle Value Assessment of a*

- Wind Turbine*. Dayton Valley, Alberta, Canada: The Pembina Institute.
- Meier, P. J. and G. Kulcinski. 2002. *Life-Cycle Energy Costs and Greenhouse Gas Emissions for Building-Integrated Photovoltaics*. Energy Center of Wisconsin.
- Meier, P. J. and G. L. Kulcinski. 2001. The potential for fusion power to mitigate US greenhouse gas emissions. *Fusion Technology* 39(2): 507-512.
- Mohan, T. 2005. An integrated approach for techno-economic and environmental analysis of energy from biomass and fossil fuels thesis, Texas A&M University, College Station, Tex.
- Mutel, C. and S. Hellweg. 2009. Regionalized Life Cycle Assessment: Computational Methodology and Application to Inventory Databases. *Environmental Science & Technology* 43: 5797-5803.
- NEEDS. 2008. *Final report on technical data, costs and life cycle inventories of biomass CHP plants*. Project no: 502687. New Energy Externalities Developments for Sustainability.
- Ney, R. A. 2001. Improving greenhouse gas reduction calculations for bioenergy systems: Incremental life cycle analysis thesis, University of Iowa
- Ney, R. A. and J. L. Schnoor. 2002. Incremental life cycle analysis: using uncertainty analysis to frame greenhouse gas balances from bioenergy systems for emission trading. *Biomass and Bioenergy* 22(4): 257-269.
- Nieuwlaar, E., E. Alsema, and B. vanEngelenburg. 1996. Using life-cycle assessments for the environmental evaluation of greenhouse gas mitigation options. *Energy Conversion and Management* 37(6-8): pp. 831-836.
- Nomura, N., A. Inaba, Y. Tonooka, and M. Akai. 2001. Life-cycle emission of oxidic gases from power-generation systems. *Applied Energy* 68(2): 215-227.
- Norton, B. 1999. Renewable electricity-what is the true cost? *Power Engineering Journal* 13(1): 6-12.

- Norton, B., P. C. Eames, and S. N. G. Lo. 1998. Full-energy-chain analysis of greenhouse gas emissions for solar thermal electric power generation systems. *Renewable Energy* 15(1-4): 131-136.
- Nunn, J. A., L. J. Wibberley, and P. H. Scaife. 2001. Coal in a sustainable society: stage I - LCA of steel and electricity production in Australia. In *5th international conference on greenhouse gas control technologies: GHGT-5, 13-16 August 2000*. Cairns, QLD (Australia): CSIRO Publishing.
- Owen, A. D. 2004. Environmental externalities, market distortions and the economics of renewable energy technologies. *Energy Journal* 25(3): 127-156.
- Pacca, S. A. and A. Horvath. 2002. Greenhouse Gas Emissions from Building and Operating Electric Power Plants in the Upper Colorado River Basin. *Environmental Science & Technology* 36(14): 3194-3200.
- Pehnt, M. and J. Henkel. 2009. Life cycle assessment of carbon dioxide capture and storage from lignite power plants. *International Journal of Greenhouse Gas Control* 3(1): 49-66.
- Proops, J. L. R., P. W. Gay, S. Speck, and T. Schroeder. 1996. The lifetime pollution implications of various types of electricity generation. *Energy Policy* 24(3): 29-237.
- Rabl, A. and J. Spadaro. 2005. *Externalities of Energy: Extension of accounting framework and policy applications, Version 2*.
- Rabl, A. R. I. and J. V. Spadaro. 2006. Environmental Impacts and Costs of Energy. *Annals of the New York Academy of Sciences* 1076(01): 516-526.
- Rafaj, P. and S. Kypreos. 2007. Internalisation of external cost in the power generation sector: Analysis with Global Multi-regional MARKAL model. *Energy Policy* 35(2): 828-843.
- Ramjeawon, T. 2008. Life cycle assessment of electricity generation from bagasse in Mauritius. *Journal of Cleaner Production* 16(16): 1727-1734.

- Rashad, S. M. and F. H. Hammad. 2000. Nuclear power and the environment: comparative assessment of environmental and health impacts of electricity-generating systems. *Applied Energy* 65(1-4): 211-229.
- Ratifa-Brown, J. A., L. M. Manfredo, J. W. Hoffman, M. Ramezan, and G. J. Steigel. 2002. An Environmental Assessment of IGCC Power Systems. Paper presented at Nineteenth Annual Pittsburgh Coal Conference, Pittsburgh, PA.
- Raugei, M. and P. Frankl. 2008. Life cycle impacts and total costs of present and future photovoltaic systems: state-of-the art and future outlook of a strategic technology option for a sustainable energy system. In *Sustainable Energy Production and Consumption*: Springer Netherlands.
- Raugei, M. and P. Frankl. 2009. Life cycle impacts and costs of photovoltaic systems: \ Current state of the art and future outlooks. *Energy* 34(3): 392-399.
- Raynolds, M. and A. Pape. 2000. *The Pembina Institute green power guidelines for Canada*. Canada: Pembina Institute, Drayton Valley, AB (Canada); Pembina Institute for Appropriate Development, Drayton Valley, AB (Canada).
- Ren, T., Y. Li, D. Fang, and H. Li. 1998. Comparative health risk assessment of nuclear power and coal power in China. *Journal of Radiological Protection* 18(1): 29-36.
- Renouf, M. A. 2000. Life Cycle Assessment of electricity generation from sugarcane bagasse, thesis, Department of Geographical Sciences and Planning, The University of Queensland.
- Riva, A., S. D'Angelosante, and C. Trebeschi. 2006. Natural gas and the environmental results of life cycle assessment. *Energy* 31(1 ): 138-148.
- Rogge, S. and M. Kaltschmitt. 2003. Electricity and heat production from geothermal energy - An ecologic comparison. *Erdoel Erdgas Koble/EKEP* 119(1): 35-40.

- Roth, I. F. and L. L. Ambs. 2004. Incorporating externalities into a full cost approach to electric power generation life-cycle costing. *Energy* 29(12-15): 2125-2144.
- Rydh, J., M. Jonsson, and P. Lindahl. 2004. *Replacement of Old Wind Turbines Assessed from Energy, Environmental and Economic Perspectives*. Kalmar, Sweden: University of Kalmar, Department of Technology.
- Sadamichi, Y. and S. Kato. 2006. Life cycle impact assessment of fuel procuring and electricity generating processes in Japan by using an 'LCA-NETS' scheme. *International Journal of Emerging Electric Power Systems* 7(1): 1-19.
- Sakamoto, Y. and W. Zhou. 2000. Energy analysis of a CO<sub>2</sub> recycling system. *International Journal of Energy Research* 24(6): 549-559.
- Sampattagul, S., S. Kato, T. Kiatsiriroat, and A. Widiyanto. 2004. Life cycle considerations of the flue gas desulphurization system at a lignite-fired power plant in Thailand. *International Journal of Life Cycle Assessment* 9(6): 387-393.
- Searcy, E. and P. Flynn. 2008. Processing of Straw/Corn Stover: Comparison of Life Cycle Emissions. *International Journal of Green Energy* 5(6): 423-437.
- Sims, R. E. H., H. H. Rogner, and K. Gregory. 2003. Carbon emission and mitigation cost comparisons between fossil fuel, nuclear and renewable energy resources for electricity generation. *Energy Policy* 31(13): 1315-1326.
- Sokka, L., S. Koskela, and J. Seppaelae. 2005. *Life cycle inventory analysis of hard coal based electricity generation*. SYKE-JULK--797. Helsinki, Finland:
- Sovacool, B. K. 2008. Valuing the greenhouse gas emissions from nuclear power: A critical survey. *Energy Policy* 36(8): 2950-2963.

- Spath, P. L. and M. K. Mann. 2001. *Capturing and Sequestering CO<sub>2</sub> from a Coal-fired Power Plant - Assessing the Net Energy and Greenhouse Gas Emissions*. Golden, CO: National Renewable Energy Laboratory.
- Spitzley, D. V. and G. A. Keoleian. 2005. *Life cycle environmental and economic assessment of willow biomass electricity: A comparison with other renewable and non-renewable sources*. University of Michigan, Center for Sustainable Systems.
- Steenhof, P. 2003. Development of integrated assessment modeling for energy systems: A case study of a Chinese electricity system. In *2003 Energy and Environment, 11-14 October 2003*. Changsha, China: Science Press.
- Sundqvist, T. 2004. What causes the disparity of electricity externality estimates? *Energy Policy* 32(15): 1753-1766.
- Tahara, K., T. Kojima, and A. Inaba. 1997. Evaluation of CO<sub>2</sub> payback time of power plants by LCA. *Energy Conversion and Management* 38(Supp.1): S615-S620.
- Trieb, F. 2005. *MED-CSP 2005. Concentrating Solar Power for the Mediterranean Region. Final Report*. MED-CSP 2005. Stuttgart: German Aerospace Center (DLR). Institute of Technical Thermodynamics. Section Systems Analysis and Technology Assessment.
- Tsoulfanidis, N. 1981. Energy Analysis of Coal, Fission, and Fusion Power Plants. *Nuclear Technology/Fusion* 1: 238-254.
- TUBITAK. 2007. *Lignite and Biodiesel Fuel Cycle for Turkey*. Marmara Research Center, Energy Institute.
- Tzimas, E., A. Georgakaki, and S. Peteves. 2009. Reducing CO<sub>2</sub> emissions from the European power generation sector - Scenarios to 2050. *Energy Procedia* I: 4007-4013.
- Uchiyama, Y. 1997. Environmental life cycle analysis of geothermal power generating

technology; Chinetsu hatsuden gijutsu no kankyo life cycle bunseki. *Denki Gakkaishi (Journal of the Institute of Electrical Engineers in Japan)* 117(11): 752-755.

Uchiyama, Y. 1996. Life Cycle Analysis of Electricity Generation and Supply Systems:

Net Energy Analysis and Greenhouse Gas Emissions. Paper presented at Electricity, Health and the Environment: Comparative Assessment in Support of Decision Making, Vienna.

UNEP. 1989. *The environmental impacts of production and use of energy*. Nairobi:

UNEP.

United Kingdom Department of Energy. 1989. *An Evaluation of Energy Related*

*Greenhouse Gas Emissions and Measures to Ameliorate Them*. UK Country Study for the Intergovernmental Panel on Climate Change, Response Strategies Working Group, Energy and Industry Sub Group.

van Engelenburg, B. C. W. and E. Nieuwlaar. 1992. *Environmental Aspects of Energy*

*Supply: Conventional and Future Options*. 92071. Utrecht, The Netherlands: University of Utrecht.

van de Vate, J. F. 1996. Comparison of the greenhouse gas emissions from the full energy

chains of solar and wind power generation. In *IAEA Advisory Group Meeting organized by the IAEA Headquarters, Vienna, 21-24 October 1996*. Vienna: IAEA.

van de Vate, J. F. 1997. Comparison of energy sources in terms of their full energy chain

emission factors of greenhouse gases. *Energy Policy* 25(1): 1-6.

Varun, I. K. Bhat, and R. Prakash. 2009. LCA of renewable energy for electricity

generation systems—A review *Renewable & Sustainable Energy Reviews* 13(6): 1067-1073.

Viebahn, P., J. Nitsch, M. Fischedick, A. Esken, D. Schwer, N. Supersberger, U.

Zuberbühler, and O. Edenhofer. 2007. Comparison of carbon capture and storage with renewable energy technologies regarding



- structural, economic, and ecological aspects in Germany. *International Journal of Greenhouse Gas Control* 1(1): 121-133.
- Vladu, I. F. 1995. *Energy Chain Analysis for Comparative Assessment in the Power Sector*. Vienna: IAEA.
- Voorspools, K. R., E. A. Brouwers, and W. D. D'Haeseleer. 2000. Energy content and indirect greenhouse gas emissions embedded in 'emission-free' power plants: results for the low countries. *Applied Energy* 67(3): 307-330.
- Voss, A. 2002. LCA and external costs in comparative assessment of electricity chains. Decision support for sustainable electricity provision? Paper presented, NEA (Nuclear Energy Agency of the OECD).
- Waku, H., I. Tamura, M. Inoue, and M. Akai. 1995. Life cycle analysis of fossil power plant with CO<sub>2</sub> recovery and sequestering system. *Energy Conversion and Management* 36(6-9): 877-880.
- Weinrebe, G., M. Bohnke, and F. Trieb. 1998. Life cycle assessment of an 80 MW SEGS plant and a 30 MW PHOEBUS power tower. In *International Solar Energy Conference. Solar Engineering 1998*. Albuquerque, NM: ASME.
- Weisser, D. 2007. A guide to life-cycle greenhouse gas (GHG) emissions from electric supply technologies. *Energy* 32(9): 1543-1559.
- White, S. 2006. Net Energy Payback and CO<sub>2</sub> Emissions from Three Midwestern Wind Farms: An Update *Natural Resources Research* 15(4): 271-281.
- White, S. W. and G. Kulcinski. 1999. Birth to death analysis of the energy payback ratio and CO<sub>2</sub> gas emission rates from coal, fission, wind, and DT fusion electrical power plants. In *6th IAEA Meeting on Fusion Power Plant Design and Technology*. Cullham, England: Fusion Technology Institute, University of Wisconsin.
- White, S. W. and G. L. Kulcinski. 1998. *Net Energy Payback and CO<sub>2</sub> Emissions from*

- Wind-Generated Electricity in the Midwest*. UWFD-1092. Madison, WI: University of Wisconsin. Madison.
- White, S. W. and G. L. Kulcinski. 1999. *Energy payback ratios and CO<sub>2</sub> emissions associated with the UWM-AK-I and ARIES-RS DT-fusion power plants: Fusion Technology*. UWFD-1091. Madison, WI: University of Wisconsin. Madison.
- White, S. W., G. Kulcinski, S. W. White, and G. L. Kulcinski. 2000. Birth to death analysis of the energy payback ratio and CO<sub>2</sub> gas emission rates from coal, fission, wind, and DT-fusion electrical power plants. *Fusion Engineering & Design* 48(248): 472-481.
- Wibberley, L., P. Scaife, and J. Winsen. 2008. *GHG and cost implications of spinning reserve for high penetration renewables*. Cooperative Research Centre for Coal in Sustainable Development.
- Wicke, B., V. Dornburg, M. Junginger, and A. Faaij. 2008. Different palm oil production systems for energy purposes and their greenhouse gas implications. *Biomass and Bioenergy* 32(12): 1322-1337.
- Widiyanto, A., S. Kato, and N. Maruyama. 2002. A LCA/LCC optimized selection of power plant system with additional facilities options. *Journal of Energy Resources Technology-Transactions of the ASME* 124(4): 290-299.
- Wihersaari, M. 2005. Greenhouse gas emissions from final harvest fuel chip production in Finland. *Biomass & Bioenergy* 28(5): 435-443.
- World Energy Council. 2004. *Comparison of Energy Systems using Life Cycle Assessment*. London, United Kingdom: World Energy Council.
- Yamada, K., H. Komiyama, K. Kato, and A. Inaba. 1995. Evaluation of photovoltaic energy systems in terms of economics, energy and CO<sub>2</sub> emissions. *Energy Conversion and Management* 36(6-9): 819-822.
- Yang, Y. H., S. J. Lin, and C. Lewis. 2007. Life cycle assessment of fuel selection for power generation in Taiwan. *Journal of the Air & Waste Management Association* 57(11): 1387-1395.

Yasukawa, S., Y. Tadokoro, and T. Kajiyama. 1992. Life Cycle CO<sub>2</sub> Emission from Nuclear Power Reactor and Fuel Cycle System. Paper presented at Expert Workshop on life-cycle analysis of energy systems methods and experience.

Zhu, X., L. R. Applequist, and K. Halsnaes. 2008. *Report on the comparative assessment of fuel cycle costs and methodological challenges across the participating countries*. 518294 SES6.

### **Fail Primary Screening (n=75)**

Ayers, R. U. and L. W. Ayers. 1996. *Eco-Thermodynamics: Exergy and Life Cycle Analysis*.

Basson, L. and J. G. Petrie. 2007. An integrated approach for the consideration of uncertainty in decision making supported by Life Cycle Assessment. *Environmental Modelling and Software* 22(2): 167-176.

Bolin, B. 1977. Impact of Production.

Brent, A. 2003. Comparative Evaluation of Life Cycle Impact Assessment Methods.

Brent, A. 2005. Environmental Performance Resource Impact Indicator.

Brent, A. C. and S. J. Mangena. 2006. Application of a Life Cycle Impact Assessment framework to evaluate and compare environmental performances with economic values of supplied coal products. *Journal of Cleaner Production* 14(12-13): 1071-1084.

Carpentieri, M., A. Corti, and L. Lombardi. 2005. Life cycle assessment (LCA) of an integrated biomass gasification combined cycle IBGCQ with CO<sub>2</sub> removal. *Energy Conversion and Management* 46(11-12): 1790-1808.

Chen, G. Q. and Z. M. Chen. 2010. Carbon emissions and resources use by Chinese economy 2007: A 135-sector inventory and input-output embodiment. *Communications in Nonlinear Science and Numerical Simulation* In

Press, Corrected Proof.

- Chen, Z. M., G. Q. Chen, J. B. Zhou, M. M. Jiang, and B. Chen. 2010. Ecological input-output modeling for embodied resources and emissions in Chinese economy 2005. *Communications in Nonlinear Science and Numerical Simulation* 15(7): 1942-1965.
- Chevalier, C. and F. Meunier. 2005. Environmental assessment of biogas co- or tri-generation units by life cycle analysis methodology.
- Cornelissen, R. L. and G. G. Hirs. 2002. The value of the exergetic life cycle assessment besides the LCA. *Energy Conversion and Management* 43(9-12): 1417-1424.
- Curran, M. A., M. K. Mann, and G. Norris. 2002. *Report on the International Workshop on Electricity Data for Life Cycle Inventories*. EPA/600/R-02/041. Cincinnati, Ohio: U.S. EPA.
- Curran, M. A., M. Mann, and G. Norris. 2005. The international workshop on electricity data for life cycle inventories. *Journal of Cleaner Production* 13(8): 853-862.
- Czaplicka-Kolarz, K., J. Wachowicz, and M. Bojarska-Kraus. 2004. A life cycle method for assessment of a colliery's eco-indicator. *International Journal of Life Cycle Assessment* 9(4): 247-253.
- Darras, M. 2001. From life cycle analysis approach to monetarisation of the impacts: an evaluation in term of decision process. Paper presented at Externalities and Energy Policy: The Life Cycle Analysis Approach, Paris, France.
- Dones, R. 1998. Choice of Electricity Mix.
- Dotzauer, E. 2010. Greenhouse gas emissions from power generation and consumption in a nordic perspective. *Energy Policy* 38(2): 701-704.
- Dubreuil, A. 2001. Inventory for energy production in Canada. *International Journal of*

- Life Cycle Assessment* 6(5): 281-284.
- Ellis, M. S. and R. H. Affolter. 2007. *Fly ash: from cradle to grave. Tutorial/Workshop, June 10., 2007*. U.S. Geological Survey Open-File Report 2007-1160. Clearwater, Florida: US Geological Survey.
- Frischknecht, R. 2000. Allocation in Life Cycle Inventory Analysis.
- Ghosh, S. and S. De. 2006. Energy analysis of a cogeneration plant using coal gasification and solid oxide fuel cell *Energy* 31(2-3): 345-363.
- Gray, D., C. White, G. Tomlinson, M. Ackiewicz, and E. Schmetz. 2007. *Increasing Security and Reducing Carbon Emissions of the U.S. Transportation Sector: A Transformational Role for Coal with Biomass*. National Energy Technology Laboratory.
- Hamamatsu. 2003.
- Hamamatsu. 2004. Energy Chain Greenhouse. Paper presented.
- Harkin, T., A. Hoadley, and B. Hooper. 2010. Reducing the energy penalty of CO<sub>2</sub> capture and compression using pinch analysis. *Journal of Cleaner Production* 18(9): 857-866.
- Harkin, T., A. Hoadley, and B. Hooper. 2010. Reducing the energy penalty of CO<sub>2</sub> capture and compression using pinch analysis. *Journal of Cleaner Production* 18: 857-866.
- Harper. 2009. Electric Power Network Decison Effects.
- Hofstetter, P., R. Frischknecht, I. Knoepfel, P. Suter, E. Walder, and R. Dones. 1995. Eco-Inventories for Energy-Systems - Exemplified on the Brown-Coal and Hard-Coal System. *Brennstoff-Warme-Kraft* 47(1-2): 23-32.
- Holdren, J. P. 1978. Coal In Context: Its Role In The National Energy Future. *Houston Law Review*.
- Holt, N. A. H. 2003. Operating experience and improvement opportunities for coal-based

- IGCC plants. *Materials at High Temperatures* 20(1): 1-6.
- Huijbregts, M. 1999. *Life-cycle impact assessment of acidifying and eutrophying air pollutants*.
- Inaba, A. 1996. Evaluation of Environmental Impacts.
- Jaramillo, P. 2006. Comparative Life Cycle Emissions of Coal, Domestic Natural Gas, LNG, SNG for Electricity Production.
- Jungmeier, G. and J. Spitzer. 2001. Greenhouse gas emissions of bioenergy from agriculture compared to fossil energy for heat and electricity supply. *Nutrient Cycling in Agroecosystems* 60(1-3): 267-273.
- Kaldellis, J. K., E. M. Kondili, and A. G. Paliatsos. 2008. The Contribution of Renewable Energy Sources on Reducing the Air Pollution of Greek Electricity Generation Sector. *Fresenius Environmental Bulletin* 17(10A): 1584-1593.
- Kannan, R., K. C. Leong, R. Osman, and H. K. Ho. 2007. Life cycle energy, emissions and cost inventory of power generation technologies in Singapore. *Renewable and Sustainable Energy Reviews* 11(4): 702-715.
- Keoleian, G. A. 2006. Life Cycle Based Sustainability Metrics.
- Khoo, H. H. 2006. Life Cycle Investigation of CO<sub>2</sub> Recovery and Sequestration. *Environmental Science and Technology* 40: 4016-4024.
- Kok, I. C., P. Lako, and R. Van Ree. 1995. *Environmental life cycle analysis of a Steam And Gas Turbine cycle (STAG) and Integrated Coal Gasification Combined Cycle (ICGCC); Milieugerichte levenscyclusanalyse van STEG en KV-STEAG*. ECN-C--95-051. Petten, Netherlands: Netherlands Energy Research Foundation (ECN).
- Kommonen, F. and S. Rhodes. 2006. Use of environmental life cycle impact assessment for power generation systems: Canadian electricity association case study. In *IEEE International Symposium on Electronics and the*

- Environment*, 8-11 May 2006. Scottsdale, AZ: IEEE.
- Kuttenbaum. 1999. CO2 Balance Gas Fired Decentral Power.
- Kypreos, S. and R. A. Krakowski. 2002. *Electrical-Generation Scenarios for China*. PSI-02-08; ISSN 1019-0643. Villigen, Switzerland: Paul Scherrer Institut.
- Larson, E. D. 2003. Synthetic Fuel Production by Indirect Coal Liquefaction.
- Lenzen, M. 1998. Primary Energy and Greenhouse Gas Embodied in Australian Final Consumption: An Input-Output Analysis.
- Lenzen, M. 2008. Double Counting In Life Cycle Calculations.
- Lenzen, M. 2009. *Current State of Development of Electricity Generating Technologies – A Literature Review*.
- Levi, T. P., K. A. Lichti, J. D. Morris, and D. M. Firth. 2003. Life cycle issues of power plant in Australia and New Zealand. *Materials at High Temperatures* 20(1): 85-92.
- Lin, Q.-t., S.-y. Li, C.-y. Yi, and Z.-h. Wang. 2005. Human health risk assessment of airborne pollutants from coal-fired power plants by life cycle method. *Acta Scientiarum Naturalium Universitatis Sunyatseni* 44(2): 116-120.
- Liu, J.-Y., Y. Qian, X.-X. Li, and Z.-X. Huang. 2009. Life cycle assessment of coal-fired power generation and its alternatives. *Meitan Xuebao/Journal of the China Coal Society* 34(1): 133-138.
- Mangena, S. J. and A. C. Brent. 2006. Application of a Life Cycle Impact Assessment framework to evaluate and compare environmental performances with economic values of supplied coal products. *Journal of Cleaner Production* 14(12-13): 1071-1084.
- Matsuno, Y. and M. Betz. 2000. Development of life cycle inventories for electricity grid

- mixes in Japan. *The International Journal of Life Cycle Assessment* 5(5): 295-305.
- Maurice, B., R. Frischknecht, V. Coelho-Schwartz, Hungerb, and K. hler. 2000. Uncertainty analysis in life cycle inventory. Application to the production of electricity with French coal power plants. *Journal of Cleaner Production* 8(2): 95-108.
- Min, K.-R., S. H. Kim, T.-W. Kim, and W. S. Jeong. 2004. A Comparative Study on Environmental Assessment for Power Generation Systems using LCA methodology. In *Korean Nuclear Society Autumn Meeting*.
- Moora, H. and V. Lahtvee. 2009. Electricity Scenarios for the Baltic States and Marginal Energy Technology in Life Cycle Assessments - A Case Study of Energy Production from Municipal Waste Incineration. *Oil Shale* 26(3): 331-346.
- Nazarko, J., A. Schreiber, W. Kuckshinrichs, and P. Zapp. 2007. Environmental analysis of the coal-based power production with amine-based carbon capture. In *Risø International Energy Conference 2007, 22-24 May 2007*. Roskilde, Denmark.
- NEDO. 2001. Survey Environmental Effects Coal Conversion.
- Odeh, N. A. and T. T. Cockerill. 2007. Life cycle emissions from fossil fuel power plants with carbon capture and storage. In *3rd international conference on clean coal technologies for our future: CCT 2007, 15-17 May 2007*. Cagliari, Italy: IEA Clean Coal Centre
- Perdikaris, N., K. D. Panopoulos, L. Fryda, and E. Kakaras. 2009. Design and optimization of carbon-free power generation based on coal hydrogasification integrated with SOFC. *Fuel* 88(8): 1365-1375.
- Schaeffer, R. and A. S. Szklo. 2001. Future electric power technology choices of Brazil: a possible conflict between local pollution and global climate change. *Energy Policy* 29(5): 355-369.
- Skodras, G., P. Grammelis, E. Kakaras, and G. P. Sakellariopoulos. 2004. Evaluation of



- the environmental impact of waste wood co-utilisation for energy production. *Energy* 29(12-15): 2181-2193.
- Steen, B. 2000. *A systematic approach to environmental priority strategies in product development (EPS)*.
- Streimikiene, D. 2010. Comparative assessment of future power generation technologies based on carbon price development. *Renewable and Sustainable Energy Reviews* 14(4): 1283-1292.
- Streimikiene, D. 2010. Comparative assessment of future power generation technologies based on carbon price development. *Renewable & Sustainable Energy Reviews* 14: 1283-1292.
- Takeshita, T., Y. Uchiyama, K. Ito, and H. Hayashibe. 1998. Life cycle analysis of world electricity in the 21st century using the world energy LCA model. *International Journal of Global Energy Issues* 11(1/2/3/4): 42-50.
- Uchiyama, Y. and H. Yamamoto. 1992. *Greenhouse effect analysis of power generation plants*. CRIEPI No. 91005. Tokyo, Japan: Central Research Institute of the Electricity Producing Industry (CRIEPI).
- van de Vate, J. F. 1994. Full energy chain analysis of greenhouse gas emissions from different energy sources. In *IAEA advisory group meeting on analysis of net energy balance and full-energy-chain greenhouse gas emissions for nuclear and other energy systems, Beijing, China, 4-7 October 1994*. Beijing, China: International Atomic Energy Agency.
- Vattenfall, C. 1999. *Vattenfall's life cycle studies of electricity*.
- Vattenfall, C. 2005. *Life Cycle Analysis of Vattenfall's Electricity Production in Sweden*.
- Wang, S., Q. Song, and C. Chen. 2001. Life cycle assessment on energy utilization technologies. Paper presented at International Conference on Energy Conversion and Application (ICECA'2001), 17-20 June 2001, Wuhan, China.
- Wangkiat, A. 2003. Characterisation of PM10 Composition from Biomass Burning Emissions in Mae Moh area, Thailand. Paper presented.

- Weidema, B. 2001. Avoiding Co Product Allocation in Life Cycle Assessment. *Journal of Industrial Ecology*.
- Widiyanto, A., S. Kato, N. Maruyama, and Y. Kojima. 2003. Environmental impact of fossil fuel fired co-generation plants using a numerically standardized LCA scheme. *Journal of Energy Resources Technology, Transactions of the ASME* 125(1): 9-16.
- Yoon, S. Y. and T. Yamada. 2002. *Life Cycle Inventory Analysis of Fossil Energies in Japan*.
- Zerlia, T. 2003. Life-cycle greenhouse gas emissions of fossil fuels in power generation: remarks on the Italian energy scenario; Emissioni dei gas serra nel ciclo di vita dei combustibili fossili utilizzati nella produzione termoelettrica: considerazioni e ricadute sullo scenario energetico italiano. *Rivista dei Combustibili* 57(1): 3-17.
- Zhang, H., S. Wang, Z. Li, and W. Ni. 2005. Integration of indirect CO<sub>2</sub> emissions from the full energy chain. *Qinghua Daxue Xuebao/Journal of Tsinghua University* 45(11): 1569-1572.

### References cited in Supporting Information

- Corrado, A., P. Fiorini, and E. Sciubba 2006. Environmental assessment and extended exergy analysis of a “zero CO<sub>2</sub> emission,” high-efficiency steam power plant. *Energy* 31(15): 3186–3198.
- Dones, R., C. Bauer, R. Bolliger, B. Burger, M. Faist Emmenegger, R. Frischknecht, T. Heck, N. Jungbluth, and A. Röder. 2007. *Life cycle inventories of energy systems: Results for current systems in Switzerland and other UCTE countries*. EcoInvent Report No. 5.
- European Commission (Eur. Com.), Directorate-General XII. 1995. *ExternE Project: Externalities of Energy. Report 3, Coal and Lignite Fuel Cycles*.

- Fiaschi, D. and L. Lombardi. 2002. Integrated gasifier combined cycle plant with integrated CO<sub>2</sub>-H<sub>2</sub>S removal: Performance analysis, life cycle assessment and exergetic life cycle assessment. *International Journal of Applied Thermodynamics* 5(1): 13–24.
- Friedrich, R. and T. Marheineke. 1994. Life cycle analysis of electric systems: Methods and results. Presented at IAEA advisory group meeting on analysis of net energy balance and full-energy-chain greenhouse gas emissions for nuclear and other energy systems, 4–7 October, Beijing, China. International Atomic Energy Agency.
- Hartmann, D. and M. Kaltschmitt. 1999. Electricity generation from solid biomass via co-combustion with coal—Energy and emission balances from a German case study. *Biomass & Bioenergy* 16(6): 397–406.
- Intergovernmental Panel on Climate Change (IPCC). 2007. *Contribution of Working Group I to the Fourth Assessment Report of the Intergovernmental Panel on Climate Change*. Chap. 2.10.2. Direct Global Warming Potentials. Solomon, S; D. Qin; M. Manning; Z. Chen; M. Marquis; K. B. Averyt; M. Tignor; Miller, H.L. eds. Cambridge and New York: Cambridge University Press.  
[www.ipcc.ch/publications\\_and\\_data/ar4/wg1/en/ch2s2-10-2.html](http://www.ipcc.ch/publications_and_data/ar4/wg1/en/ch2s2-10-2.html). Accessed January 2011.
- Jaramillo, P., W.M. Griffin, H.S. Matthews. 2007. Comparative life-cycle air emissions of coal, domestic natural gas, LNG, and SNG for electricity generation. *Environmental Science & Technology* 41(17): 6290–6296.
- Koornneef, J., T. van Keulen, A. Faaij, and W. Turkenburg. 2008. Life cycle assessment of a pulverized coal power plant with post-combustion capture, transport and storage of CO<sub>2</sub>. *International Journal of Greenhouse Gas Control* 2(4): 448–467.
- May, J. R. and D. J. Brennan. 2003. Life cycle assessment of Australian fossil energy options. *Process Safety and Environmental Protection: Transactions of the Institution of Chemical Engineers, Part B* 81(5): 317–330.
- National Energy Technology Laboratory (NETL). 2010a. Life cycle analysis: Existing pulverized coal (EXPC) power plant.  
<http://www.netl.doe.gov/energy-analyses/refshelf/> . Accessed January 2011.
- National Energy Technology Laboratory (NETL). 2010b. Life cycle analysis: Integrated

- gasification combined cycle (IGCC) power plant. [www.netl.doe.gov/energy-analyses/refshelf/](http://www.netl.doe.gov/energy-analyses/refshelf/). Accessed January 5, 2011.
- National Energy Technology Laboratory (NETL). 2010c. Life cycle analysis: supercritical pulverized coal (SCPC) power plant. <http://www.netl.doe.gov/energy-analyses/refshelf/>. Accessed January 2011.
- Odeh, N. A. and T. T. Cockerill. 2008. Life cycle GHG assessment of fossil fuel power plants with carbon capture and storage. *Energy Policy* 36(1): 367–380.
- Ruether, J. A., M. Ramezan, and P. Balash. 2004. Greenhouse gas emissions from coal gasification power generation systems. *Journal of Infrastructure Systems* 10(3): 111–119.
- SENES Consultants Limited. 2005. Methods to assess the impacts on the natural environment of generation options. Richmond Hill, Ontario, Canada: Prepared by SENES Consultants for the Ontario Power Authority.
- U.S. Environmental Protection Agency. 2009. eGRID 2007 Version 1.1. <http://www.epa.gov/cleanenergy/energy-resources/egrid/index.html>. Accessed January 2011.
- Wibberley, L. 2001. Coal in a sustainable society. *Coal for sustainable development*. Brisbane, Queensland, Australia: Australian Coal Association Research Program.
